41 interferon independent ISGs expression. However, systems biology behind this immune  
42 response is unknown. In this study, in vivo transcriptome profiling of PBMC subsets  
43 (CD4+, CD8+, CD14+, CD21+ and CD335+) in vaccinated goats and sheep (at 5 days  
44 of post vaccination) was done to understand this systems biology. Though there are a  
45 few differences in the systems biology across cells (specially the NK cells) between  
46 sheep and goats, the co-ordinated response that is inclusive of all the cell subsets was  
47 found to be towards induction of strong innate immune response, which is needed for  
48 an appropriate adaptive immune response.

49

## 50 **1. Introduction**

51 Peste des petits ruminants (PPR) is an OIE listed acute, highly contagious  
52 transboundary viral disease of small ruminants, caused by PPR virus of genus  
53 *Morbillivirus* and family *Paramyxoviridae* [1]. Morbidity and mortality can be as high as  
54 100% and 90%, respectively [2]. The disease manifests as fever, discharge from the  
55 eyes and nose, stomatitis, pneumonia and enteritis [3]. PPRV vaccine developed by  
56 continuous passage (N=59) of Sungri/96 strain in Vero cells is widely used throughout  
57 India [4]. The vaccine provides long-lasting robust innate and adaptive - humoral and a  
58 strong cell-mediated immunity [2], which, however, warrants further investigation [5], [6],  
59 [7]. PPRV is lymphotropic and epitheliotropic [8], [9], [10]. The primary receptors for  
60 PPRV include the signalling lymphocyte activation molecule (SLAM) on activated T  
61 cells, B cells, and dendritic cells and Nectin-4 receptor on epithelial cells [8], [9], [11].

62 Immune response is complex within a host and different cell types respond  
63 differently to infection as different classes of receptors receive cues and produce distinct  
64 effector molecules [12]. It is a highly coordinated effort of distinctly programmed  
65 hematopoietic cell types, and a product of various direct and indirect effects and  
66 interactions between similar or different cell types [13]. Moreover, the tissue  
67 microenvironment also affects the elicited immune response. In case of viruses, the  
68 complexity of the host response depends on variations in genetic makeup, cell tropism  
69 and replication kinetics [12], [13], [14], [15]. PBMCs include T helper cells (CD4+), T  
70 cytotoxic cells (CD8+), B-lymphocytes (CD21+), monocytes (CD21+) , natural killer  
71 cells (CD335+) and dendritic cells (CD320+), which play an important role in virus  
72 recognition and induce immune response for host defence. While analysing whole blood  
73 or PBMCs, the response of under-represented cell populations can be masked [13].

74 Despite advances in our understanding of vaccines, the mechanisms by which  
75 protective immune responses are orchestrated among the cell subsets are little known.  
76 Molecular patterns and gene signatures detected in blood post vaccination represent a  
77 strategy to prospectively determine vaccine efficacy [16]. The conventional  
78 immunological methods like ELISA, ELISpot etc. are of utmost importance in this regard  
79 and may continue to remain so in future [17]. However, these approaches are inept at  
80 predicting the systems biology behind immune - protection. Delineating the systems  
81 biology would help understanding the molecular mechanisms of vaccine induced  
82 immune responses. RNA sequencing is a widely used quantitative transcriptome  
83 profiling system for deciphering the systems biology comprehensively [18]. Previously,  
84 RNA sequencing was used to unravel transcription factors, which modulate immune  
85 response to PPRV Sungri/96 live attenuated vaccine strain *in vitro* in PBMCs [6]. Also, a

86 predicted immune signalling pathway of PPRV Sungri/96 vaccine induced immune  
87 response with predominant role of IRFs, TRIMs and ISGs in creation of robust antiviral  
88 state *in vitro* in PBMCs has been proposed [7].

89 Till now there are no *in vivo* reports of transcriptome profiling of PBMC subsets in  
90 PPRV vaccinated goats and sheep. Herein, transcriptional profiling of circulating CD4+,  
91 CD8+, CD14+, CD21+ and CD335+ cells of PPRV vaccinated sheep and goats at 0  
92 day (control i.e. just before vaccination) and before the development of antibody  
93 response (5 days post vaccination i.e. 5dpv) to decipher the vaccine induced immune  
94 response was done.

## 95 **2. Materials and methods**

### 96 **2.1 Animal experiment, ethics statement and virus**

97 Live attenuated PPR vaccine virus (Sungri/96) was used as vaccine virus.  
98 Permission for studies on animal subjects was obtained and protocols approved from  
99 IVRI – Institutional Animal Ethics Committee (IAEC) under CPCSEA, India vide letter  
100 no. 387/CPCSEA. The vaccine potency testing experiment was carried out as per the  
101 guidelines of Indian Pharmacopeia – 2014 (page.no: 3626).

102 In this study, healthy sheep and goats (n=5, age=12 months) confirmed negative  
103 for PPRV antibodies (c-ELISA and SNT) and PPRV antigen (s-ELISA) [19], [20] were  
104 used. On c-ELISA, the samples with a percent inhibition (PI) value of >40% were  
105 considered positive. The animals were acclimatised for 14 days, followed by vaccination  
106 on day 0 with a 10<sup>3</sup> TCID<sub>50</sub> field dose of Sungri/96 strain through sub-cutaneous route,  
107 as mentioned in our previous report [21]. All the animals vaccinated survived the  
108 challenge from the virulent PPRV in the vaccine potency testing experiment.

### 109 **2.2 Isolation of T helper cells, T cytotoxic cells, B lymphocytes, monocytes and 110 natural killer cells by magnetic assisted cell sorting technology (MACS)**

111 Blood was collected from the animals (n=5) in heparin coated vacutainer vials at 0  
112 day (just before vaccination) and 5 days post vaccination (5 dpv). PBMCs were isolated  
113 by using Ficoll Histopaque gradient method. PBMCs were strained through cell strainer  
114 of 0.40-micron size. The PBMCs cell subsets were enriched by positive selection using  
115 indirect magnetic assisted cell sorting technology (Miltenyi Biotech). Cell sorting was  
116 done as per the manufacturers protocol. Initially, the cell-specific surface marker FITC-  
117 conjugated primary antibodies, anti CD4+ (T helper cells, #MCA2213F), anti CD8+ (T  
118 cytotoxic cells, #MCA2216F), anti CD14+ (Monocytes, #MCA1568F), and anti CD21+  
119 (B lymphocytes, #MCA1195F), were used. For CD335 (NK cell) anti CD335+  
120 (#MCA5933GA as primary antibody) and FITC labelled secondary antibody (#F9137)  
121 were used. Subsequently, the cells were magnetically labeled with anti - FITC  
122 MicroBeads. Then the cell suspension was loaded on a miniMACS® column which was  
123 placed in the magnetic field of a MACS Separator. The magnetically labeled cells were  
124 retained in the column while the unlabeled cells run through. After removal of the  
125 column from the magnetic field, the magnetically retained cells were eluted as positively  
126 selected cell fraction. The purity of the cells was further checked by flow cytometer. The  
127 cells were stored in RNA later for further use at -80°C. Cells were kept on ice and cold

128 buffers were employed to minimize alterations in gene expression during labelling and  
129 sorting.

## 130 **2.4 RNA-sequencing of the samples**

131 Total RNA from each of the PBMC subsets was isolated using the RNeasy Mini kit  
132 (Qiagen GmbH, Germany) as per the manufacturer's protocol. The integrity and quantity  
133 of isolated RNA were assessed on a Bioanalyzer (Agilent Technologies, Inc). The  
134 library was prepared using NEBNext Ultra RNA Library Prep Kit for Illumina  
135 (NewEngland Biolabs Inc.) following the manufacturer's protocol. Approximately, 100ng  
136 of RNA from each sample was used for RNA library preparation. The quality of the  
137 libraries was assessed on Bioanalyzer. Libraries were quantified using a Qubit 2.0  
138 Fluorometer (Life technologies) and by qPCR. Library (1.3ml, 1.8pM) was denatured,  
139 diluted and loaded onto a flow cell for sequencing. cDNA library preparation and  
140 Illumina Sequencing was performed at Bioserve Pvt. (Hyderabad, India). RNA-Seq data  
141 was generated in FASTQ format.

## 142 **2.5 Raw data processing**

143 Raw sequence data from each sample was subjected to quality control checks  
144 using FastQC (Babraham Bioinformatics). Moreover, low quality reads with a mean  
145 phred score less than or equal to 25 and reads shorter in length than 50 nt were  
146 removed using prinseq-lite software [22] before downstream analysis. The data was  
147 submitted to the GEO database with accession number GSE155504.

## 148 **2.6 Differential expression and identification of differentially expressed genes (DEGs)**

150 Figure 1 summarizes the steps used in the analysis. Quality filtered reads from  
151 control and vaccinated samples (0 day and 5 dpv) were mapped to the *Capra hircus* or  
152 *Ovis aries* reference genome for the respective subsets. The gene counts were  
153 obtained using Bowtie2.0 in RSEM [23]. The counts were used for calculating  
154 differentially expressed genes (DEGs) by use of R packages - EBSeq, DESeq2, edgeR.  
155 The common DEGs from the three packages were used for downstream analysis while  
156 fold changes for the corresponding genes were taken from DESeq2 [24].

## 157 **2.7 Gene Ontology Analysis**

158 Initially, DEGs of each subset (CD4+, CD8+, CD14+, CD21+ and CD335+) in  
159 sheep and goats were functionally annotated in g:Profiler to identify the significant  
160 immune system KEGG pathways. The expression of common DEGs of each subset  
161 between sheep and goats that are involved in immunological KEGG pathways is  
162 represented in a heatmap. Finally, to understand the co-ordinated response across all  
163 the subsets, genes expressed in all cell subsets were functionally annotated in g:Profiler  
164 (a gene is considered expressed if it is expressed in one subset).

## 165 **2.8 Comparison analysis using Ingenuity Pathway Analysis (IPA) analysis.**

166 Ingenuity Pathway Analysis (IPA) IPA is an all-in-one, web-based software  
167 application that enables analysis, integration, and understanding of data from gene  
168 expression, miRNA, and SNP microarrays, as well as metabolomics, proteomics, and  
169 RNAseq experiments. The DEGs from all the subsets in both species were overlaid in



170 IPA against its Ingenuity Knowledge Base (IKB) to perform a comparison analysis.  
171 Canonical pathways activated (Z score > 2) or inactivated (Z score < -2) across all the  
172 subsets were identified.

## 173 **2.9 Protein-protein interaction networks**

174 Using knowledge based approach [25], [26], antiviral genes - IFIT3, ISG15, MX1,  
175 MX2, RSAD2, ISG20, IFIT5 and IFIT1 were selected based on their expression in at  
176 least one subset. Protein - protein interactions between these antiviral molecules and  
177 the common genes among all the subsets for each species were extracted using  
178 STRING [27] and customized scripts. The degree or connectivity was calculated using  
179 igraph package [28]. The complete interaction networks were visualized in Cytoscape  
180 3.8.0 [29].

## 181 **2.10 Validation of DE genes by quantitative real time PCR (qRT-PCR)**

182 qRT-PCR was performed using Applied Biosystems 7500 Fast system to validate  
183 the expression of key genes using GAPDH as an endogenous control by TaqMan  
184 chemistry in PBMC subsets. GAPDH was employed as the internal control as it was  
185 found to be suitable endogenous control in earlier studies in PPR [30]. Key genes used  
186 in the study for validation by q-RT-PCR and their TaqMan probe IDs are - DDX58,  
187 Ch04684385\_m1; IFIT3, AIAA1E0; IRF7, AI89L87; MX1, Oa04659431\_m1; ISG15,  
188 AI70N2Z; and GAPDH, AIFAT31. All the samples were run in triplicates. The relative  
189 expression of each sample was calculated using the  $2^{-\Delta\Delta CT}$  method with control as  
190 calibrator [31].

## 191 **Results**

192 In the present study, CD4<sup>+</sup>, CD8<sup>+</sup>, CD14<sup>+</sup>, CD21<sup>+</sup> and CD335<sup>+</sup> cells were enriched  
193 **(Supplementary Figure 1)** from the blood collected (5 goats and 5 sheep) at 0 day and  
194 5 dpv (5 days post vaccination). RNA was isolated from these subsets to profile the  
195 transcriptome with an aim to delineate the systems biology behind the Sungri/96  
196 vaccine induced immuno-protection at 5 dpv in sheep and goats. The number of DEGs  
197 in CD4<sup>+</sup>, CD8<sup>+</sup>, CD14<sup>+</sup>, CD21<sup>+</sup> and CD335<sup>+</sup> cells were 1834, 1641, 2343, 3910 and  
198 3607, respectively, in goats and 1464, 1586, 1847, 721 and 4019, respectively, in sheep  
199 **(Figure 2A and 2B)**. Venn diagram was generated to examine the common and unique  
200 DEGs among cells. On comparison, 618 and 139 DEGs were found common among  
201 CD4<sup>+</sup>, CD8<sup>+</sup>, CD14<sup>+</sup>, CD21<sup>+</sup> and CD335<sup>+</sup> cells, in goats and sheep, respectively. The  
202 number of unique DEGs was highest in CD21<sup>+</sup> cells of goats and CD335<sup>+</sup> cells of sheep  
203 **(Figure 2C and 2D)**.

## 204 **Gene Ontology Analysis**

205 Initially to evaluate the changes within a subset, functional annotation for genes  
206 expressed in each subset was done using g:profiler. The immune system KEGG  
207 pathways enriched in each subset were assessed. In all the cells an innate immune  
208 response leading to cell mediated adaptive immune response was observed **(Figure 3**  
209 **and Figure 4)**.

210 *CD4<sup>+</sup> cells of Sheep and Goats*

211 On comparing CD4+ cells in sheep and goats, Fc gamma R-mediated phagocytosis,  
212 Toll-like receptor signaling pathway, NOD-like receptor signaling pathway, Th1 and Th2  
213 cell differentiation, T cell receptor signaling pathway and Th17 cell differentiation were  
214 found significantly enriched in both the species. Besides these, in goats, Fc epsilon RI  
215 signaling pathway, C-type lectin receptor signaling pathway, TNF signaling pathway,  
216 Chemokine signaling pathway and NF-kappa B signaling pathway were found enriched  
217 in CD4+ cells.

#### 218 *CD8+ cells of Sheep and Goats*

219 In CD8+ cells, Th17 cell differentiation, C-type lectin receptor signaling pathway, NOD-  
220 like receptor signaling pathway, Antigen processing and presentation, Th1 and Th2 cell  
221 differentiation, T cell receptor signaling pathway, Fc gamma R-mediated phagocytosis,  
222 Chemokine signaling pathway, NF-kappa B signaling pathway were found enriched in  
223 both sheep and goats. Besides these, three more pathways - Rap1 signaling pathway,  
224 Fc epsilon RI signaling pathway and MAPK signaling pathway were enriched in sheep.

#### 225 *CD14+ cells of Sheep and Goats*

226 In CD14+ cells of both the species, Th17 cell differentiation, C-type lectin receptor  
227 signaling pathway, NOD-like receptor signaling pathway, TNF signaling pathway, Fc  
228 gamma R-mediated phagocytosis, Chemokine signaling pathway and NF-kappa B  
229 signaling pathway were found enriched. Additionally, in goats, Toll-like receptor  
230 signaling pathway, Rap1 signaling pathway and Phagosome Th1 and Th2 cell  
231 differentiation were enriched.

#### 232 *CD335+ cells of Sheep and Goats*

233 In CD335+ cells, Th17 cell differentiation, Toll-like receptor signaling pathway, C-type  
234 lectin receptor signaling pathway, Necroptosis, MAPK signaling pathway, NOD-like  
235 receptor signaling pathway, TNF signaling pathway, Fc gamma R-mediated  
236 phagocytosis, Chemokine signaling pathway and NF-kappa B signaling pathway were  
237 enriched in sheep and goats (**Figure 3 and Figure 4**). Th1 and Th2 cell differentiation  
238 and FoxO signaling pathway were found enriched additionally in goats CD335+ cells.

#### 239 *Common DEGs in each subset between Sheep and Goats*

240 The common genes in sheep and goats that are involved in immunological processes in  
241 each subset are represented in a heatmap (**Supplementary Figure 2**). In CD4+, CD8+,  
242 CD14+, CD21+ and CD335+ cells the numbers of common genes involved in  
243 immunological processes were found to be 67, 91, 122, 17 and 179, respectively. Most  
244 of the common DEGs in CD4+, CD8+ and CD14+ were found upregulated in both the  
245 species. However, in CD21+ and CD335+, a contrast in expression of these genes was  
246 observed between sheep and goats. Most of the DEGs were upregulated in goats but  
247 downregulated in sheep.

#### 248 *Coordinated response*

249 To understand the co-ordinated response across all the subsets, genes expressed  
250 in all cell subsets were functionally annotated. A total of 5512 and 5297 genes were  
251 found expressed across all subsets (**Supplementary File 2**) in goats and sheep,  
252 respectively. Among these, in goats and sheep, 689 and 703 genes, respectively, were

253 found associated with innate immune response biological processes (**Supplementary**  
254 **Figure 3**). A subset of 544 immune response genes were found to be common between  
255 sheep and goats with 144 and 158 genes being unique, respectively. This shows that in  
256 both sheep and goats the coordinated vaccine response at 5dpv across all the subsets  
257 is towards triggering a strong innate immune response as evident from the upregulation  
258 of innate immune genes.

### 259 **Comparison analysis across subsets using Ingenuity Pathway Analysis (IPA)** 260 **analysis.**

261 Ingenuity pathway analysis (IPA) evaluates the DEGs and predicts activation or  
262 inactivation of pathways. A comparative analysis was done to evaluate the canonical  
263 pathways that are activated/inactivated across all subsets in both species using IPA.  
264 Pattern Recognition Receptors (PRR) are the first line of defense against any pathogen.  
265 The role of RIG-I-like receptors (RLRs) - RIG-1, LGP2 and MDA-5 that sense viral  
266 infection, [32] was found to be predominant in CD4<sup>+</sup>, CD8<sup>+</sup> and CD14<sup>+</sup> cell subsets at 5  
267 dpv in goats and, in CD4<sup>+</sup> and CD14<sup>+</sup> cell subsets of sheep (**Figure 5**). This RIG-I  
268 recognition of viral RNA induces anti-viral state in cells by phosphorylating the IRFs [33]  
269 and regulating NF-κB activity through binding to *Nf-κb1* 3'-UTR mRNA [34]. This  
270 activation of IRFs by cytosolic pattern recognition receptors was found to be significant  
271 in CD4<sup>+</sup> cells of goats and was triggered, though not significant in CD4<sup>+</sup> cells of sheep,  
272 and in CD8<sup>+</sup> and CD14<sup>+</sup> cells of both the species (**Figure 5**). IRF3 was upregulated in  
273 CD4<sup>+</sup>, CD14<sup>+</sup>, CD21<sup>+</sup> and CD335<sup>+</sup> of goats, and in CD335<sup>+</sup> of sheep; IRF7 was  
274 upregulated in CD4<sup>+</sup>, CD8<sup>+</sup>, CD14<sup>+</sup> and CD335<sup>+</sup> of sheep, and in all cell subsets of  
275 goats (**Supplementary File 1**). IRF7 was also identified to be the most prominent  
276 upstream regulator across subsets in both the species. RNA viruses are also  
277 recognized by TLR3 (dsRNA) and/or by TLR7/8 (sRNA) [35]. At 5 dpv, role of PRRs in  
278 recognition of viruses was found activated in CD14<sup>+</sup> cells of both sheep and goats, and  
279 in CD8<sup>+</sup> cells of goats. TLR2 and TLR4 were upregulated in CD14<sup>+</sup> cells of both  
280 sheep and goats and in CD8<sup>+</sup> cells of goats. This TLR signaling results in activation of  
281 NF-κB and induction of IFN-inducible genes and co-stimulatory molecules [36].

282 The NF-κB activation by viruses was found activated in CD4<sup>+</sup>, CD8<sup>+</sup> and CD14<sup>+</sup>  
283 cells of sheep and in CD8<sup>+</sup> and CD14<sup>+</sup> cells of goats but was inactivated in CD21<sup>+</sup> cells  
284 of both sheep and goats (**Figure 5**). The genes involved in this NF-κB pathway - CD4,  
285 LCK, IKK, ERK 1/2, PKR and RIP were upregulated in CD4<sup>+</sup> cells of sheep; LCK, RAS,  
286 MEKK1, C-RAF, ERK1/2, IκB and CCR5 were upregulated, and CD21 and CXCR5  
287 were downregulated in CD8<sup>+</sup> cells of sheep; RAS, PKC, ERK 1/2, IκB, NFκB & PKR  
288 were upregulated in CD14<sup>+</sup> cells of sheep; CD4, LCK, RAS, PKR, ERK 1/2 and IκB  
289 were upregulated and CXCR5 was downregulated in CD8<sup>+</sup> cells of goats; RIP, PKR,  
290 AKT, IKK, ERK 1/2, IκB & c-RAF were upregulated and CXCR5, CD4 & LCK were  
291 downregulated in CD14<sup>+</sup> cells of goats (**Supplementary File 1**). NF-κB acts as a  
292 mediator of pro-inflammatory and anti-inflammatory gene induction and plays a role in  
293 regulating T-cell differentiation and effector function [37]. Several interleukin and  
294 chemokine signaling pathways were found activated in CD4<sup>+</sup>, CD8<sup>+</sup> and CD14<sup>+</sup> cells of  
295 both the species i.e. IL-1 signalling in CD8<sup>+</sup> cells of goats and CD14<sup>+</sup> cells of sheep; IL-  
296 15 signalling in CD8<sup>+</sup> cells of sheep and goats; IL-2 signalling in CD8<sup>+</sup> cells of sheep  
297 and goats and CD14<sup>+</sup> cells of sheep; IL-22 signalling in CD4<sup>+</sup> cells of sheep and CD8<sup>+</sup>

298 cells of sheep and goats; IL-6 signalling in CD8+ and CD14+ cells of sheep and goats;  
299 IL-8 signalling in CD4+ cells of sheep, and CD8+ cells and CD14+ cells of sheep and  
300 goats, and ; chemokine signalling in CD8+ cells and CD14+ cells of sheep and goats  
301 **(Figure 5).**

302 Dendritic cell (DC) maturation was found significantly activated in CD21+ and  
303 CD8+ cells of both the species. DCs are known to present antigenic peptides  
304 complexed with MHC class I molecules to CD8-expressing T cells in order to generate  
305 cytotoxic cells [38]. The Interferon signalling pathway that is essential for increased  
306 cellular resistance to viral infection was found activated at 5 dpv in CD4<sup>+</sup>, CD8<sup>+</sup> and  
307 CD14<sup>+</sup> cells of both the species. Interestingly, IFN alpha and beta were not  
308 dysregulated in any of the subsets in both sheep and goats. The IFN receptors IFNAR1  
309 and IFNAR2 were downregulated in most of the subsets. The absence of expression of  
310 type-I interferons in our study suggested IFN-independent ISG stimulation as reported  
311 previously for PPR [7]. However, IFNgamma receptors were found to be activated in  
312 most of the subsets. Further, most of the canonical pathways were identified to be  
313 inactivated in the CD21+ cells. This indicated that the CD21+ cells are activated later for  
314 the production of antibodies as significant increase in antibody production against PPRV  
315 vaccination was observed 14 dpv [39]. The enrichment (-log p value) of genes in cell  
316 mediated immune response and humoral immune response biofunctions was  
317 significantly higher in goats than in sheep in CD4<sup>+</sup>, CD14<sup>+</sup>, CD21<sup>+</sup> and CD335<sup>+</sup>**(Figure**  
318 **6).**

### 319 **Protein-protein interaction networks**

320 The protein-protein interaction network includes hubs connected with interacting  
321 genes. The hubs in a network reflect the functional and structural importance of the  
322 network. A total number of 618 and 139 DEGs were found to be commonly expressed in  
323 Goats and sheep, respectively in all the subsets **(Figure 2)**. On deciphering the  
324 interactions between these DEGs and the 8 antiviral molecules (IFIT3, ISG15, MX1,  
325 MX2, RSAD2, ISG20, IFIT5 and IFIT1) considered under the knowledge based  
326 approach, most of the antiviral molecules formed the hubs in the network. ISG15 in both  
327 species was found be the major hub with a connectivity of 75 and 16 in goats and  
328 sheep, respectively **(Figure 7A & Figure 7C)**. Heatmap of the genes involved in the  
329 networks revealed that most of these antiviral genes in both the species are upregulated  
330 **(Figure 7B & Figure 7D)**.

### 331 **Realtime PCR**

332 The key genes identified from RNA-seq data - *DDX58*, *IFIT3*, *IRF7*, *ISG15* and *MX1*  
333 were validated by qRT-PCR. The expression of all the validated genes was in  
334 concordance with RNA sequencing results **(Table 1)**.

### 335 **Discussion**

336 Vaccines protect against an infectious agent by inducing cells or molecules  
337 capable of rapidly controlling their replication or by inactivating their toxins. Primarily,  
338 vaccines trigger an inflammatory reaction, mediated by cells of the innate immune  
339 system - dendritic cells, monocytes and neutrophils. These cells recognize PAMPs  
340 through PRRs to get activated to produce cytokines and chemokines [40], [41], [42],



341 [43]. This inflammatory microenvironment is essential for differentiation of monocytes to  
342 macrophages, and for activation and migration of dendritic cells into the draining lymph  
343 nodes [44]. In the absence of this inflammatory response the dendritic cells remain  
344 immature and the naive T cells in the lymph nodes do not differentiate into CD4+ T  
345 cells. It is evident that PPRV - Sungri/96 live attenuated vaccine triggers activation of  
346 the innate immune system after it is phagocytosed by monocytes/dendritic cells at the  
347 site of administration [45]. This RNA virus may be then recognized by TLR3/7 on the  
348 endosome or by the RIG-1 or MDA5 in the cytosol to induce an inflammatory response.  
349 This induction of inflammatory response is evident in both sheep and goats with the  
350 triggering of several pathways viz. role of RIG1-like receptors in antiviral innate  
351 immunity, role of pattern recognition receptors in recognition of viruses, production of  
352 nitric oxide and reactive oxygen species in macrophages, NF-KB activation by viruses,  
353 and several IL signaling pathways in CD14+ cells. This triggering in inflammatory  
354 response is much needed for the activation of dendritic cells and monocytes, and for  
355 further draining of these cells to the nearest lymph node where naive T cells are  
356 activated [44]. This activation of T cells is clearly seen by the activation of pathways in  
357 CD8+ (T- cytotoxic) and CD4+ (T-helper) cells.

358 Out of the several pathways activated in both CD4+ and CD8+ cells, NOD-like  
359 receptor signaling pathway, Th1 and Th2 cell differentiation, T cell receptor signaling  
360 pathway and Th17 cell differentiation were found significantly enriched in both the  
361 species. The differentiation of T cells to Th1 and Th2 is crucial for inducing the immune  
362 response. Th1 cells stimulate cellular immune response, participate in the inhibition of  
363 macrophage activation and stimulate B cells to produce IgM and IgG1 [46]. Th2  
364 stimulates humoral immune response, promotes B cell proliferation and induces  
365 antibody production [46]. The distinct subsets of helper T cells - TH1, TH2 and TH17,  
366 are effective at protecting against pathogens [47]. Additionally, activation of C-type  
367 lectin receptors (CLRs) signaling in CD8+ cells of Sungri/96 vaccinated sheep and  
368 goats and in CD4+ cells of goats indicates induction of adaptive immune response. C-  
369 type lectin receptors (CLRs) are important pattern recognition receptors involved in  
370 recognition and induction of adaptive immunity to viruses [48]. However, in CD21+ cells  
371 most of the pathways were found inactivated/not activated as 5 dpv may be too early a  
372 time point to detect activation in the CD21+ cells.

373 NK cells (CD335+) are known to mediate both innate immune and adaptive  
374 immune responses by modulating both CD8+ and antibody production [49]. In this study  
375 most of the pathways - interferon signaling, crosstalk between dendritic cells and natural  
376 Killer cells, chemokine signaling, inflammasome pathway, iNOS signalling and  
377 complement system in NK cells were found activated in vaccinated goats than in sheep.  
378 Upregulation of RIG-1 and MDA5 in NK cell of goats reflects setting off of the innate  
379 immune response [50]. Also, activation of interferon signaling pathway in infected NK  
380 cells of goats suggests evoking of both the innate and adaptive immune responses [51].  
381 The activation of iNOS signaling invokes immune response in virus infected cells  
382 [52]. The activation of complement system in NK cells aids in antibody production by  
383 bridging both innate and adaptive immune response [53]. Upregulation of CD69,  
384 NKp30, FAS & TNFR2 and activation of crosstalk between dendritic cells and natural  
385 killer cells pathway, in goats must be embarking innate immune response, followed by  
386 adaptive response on antigen presentation after vaccination. The activation and



387 triggering of several pathways in NK cells of goats at this early time point may be  
388 because of Sungri/96 vaccine strain being of goats origin and that the activation of  
389 these pathways at a later time point in sheep cannot be ruled out.

390 The network of antiviral molecules (IFIT3, ISG15, MX1, MX2, RSAD2, ISG20,  
391 IFIT5 and IFIT1) with the DEGs commonly expressed in the subsets in both sheep and  
392 goats, reflected ISG15 as a major hub. The network was found to be dense in goats in  
393 comparison to sheep. ISG15 is one of the most highly induced ISGs in viral infections  
394 [25], [54] and was also found to be directly induced by IRF3/IRF7, independent of IFNs  
395 [55], [56], [57]. It is an ubiquitin-like protein that covalently attaches to target proteins in  
396 a process known as ISGylation [25], [58]. HERC5 is considered as the major ligating  
397 enzyme in ISGylation. This ISGylation of viral proteins was reported to have an  
398 inhibitory effect on the viral infection [59], whereas ISGylation of host proteins leads to  
399 either activation [59] or increase in stability [60]. HERC6 instead of HERC5 is  
400 considered as the major ligating enzyme in mice [61]. In our study, HERC5 and HERC6  
401 were found upregulated in goats. Further, the antiviral gatekeeper MX1 acts prior to  
402 genome replication at an early post entry step of the virus life cycle. Similarly, MX2  
403 specifically targets viral capsid and affects nuclear entry of the HIV-1 [25], [62], [63],  
404 [64]. IFIT family (IFN-induced protein with tetratricopeptide repeats) are a group of ISGs  
405 that inhibit virus replication by binding and regulating the functions of cellular and viral  
406 proteins and RNAs [65]. IFITs were also characterized to play a critical role in protecting  
407 hosts from viral pathogenesis. RSAD2, also known as Viperin, is the another most  
408 highly induced antiviral effector found in ER and ER-derived lipid droplets [66]. RSAD2  
409 was characterized to have various modes of antiviral action to inhibit enveloped viruses  
410 [67]. It can also affect virus life cycle at an early stage by inhibiting RNA replication [68].  
411 All these genes - MX1, MX2, IFIT1, RSAD2, IFIT3 and IFIT5 were found upregulated in  
412 both sheep and goats suggesting a strong antiviral response in both the species.

413 It is important to note the in our study both sheep and goats survived PPRV  
414 virulent virus challenge post vaccination, indicating an adequate immune response to  
415 counter the virus. In an independent study it was reported that Sungri/96 vaccine is  
416 equally potent in both sheep and goats [69]. In our study, though there are a few  
417 differences in the systems biology across cells (specially the NK cells) between sheep  
418 and goats, the co-ordinated response that is inclusive of all the cell subsets was found  
419 to be towards induction of strong innate immune response, which is needed for an  
420 appropriate adaptive immune response.

#### 421 **Conflict of interest**

422 None of the authors have a conflict of interest to declare.

#### 423 **Author contributions**

424 RKS, BPM, and RKG conceived and designed the research. KKR and DM  
425 performed the vaccine testing experiment. SAW and ARS conducted the wet lab work.  
426 SAW, MRP, RINK and RKG analyzed the data. SAW, MRP, RKG, APS, and BM helped  
427 in manuscript drafting and editing. RKS, BPM, and RKG proofread the manuscript.

#### 428 **Acknowledgment**

429 This study was supported in part by Centre for Agricultural Bioinformatics (ICAR-  
430 IASRI) (CABin/100644/16103/ 801/10133) and SubDIC (BTISnet), ICAR-IVRI. We also  
431 thank Department of Biotechnology, Ministry of Science and Technology (DBT) for  
432 providing fellowship and contingency for students – Sajad Ahmad Wani  
433 (DBT/2014/IVRI/171), Manas Ranjan Praharaj (CSIR:09/1150(0015)/2019-EMR-I) and  
434 Amit Ranjan Sahu (DBT/2014/IVRI/170).

## 435 References

- 436 [1] M.H. van Regenmortel, M.A. Mayo, C.M. Fauquet, J. Maniloff, Virus nomenclature:  
437 consensus versus chaos, *Archives of virology*, 145 (2000) 2227-2232.
- 438 [2] R.P. Singh, U.K. De, K.D. Pandey, Virological and antigenic characterization of two Peste  
439 des Petits Ruminants (PPR) vaccine viruses of Indian origin, *Comparative immunology,*  
440 *microbiology and infectious diseases*, 33 (2010) 343-353.
- 441 [3] P. Kumar, B.N. Tripathi, A.K. Sharma, R. Kumar, B.P. Sreenivasa, R.P. Singh, P. Dhar, S.K.  
442 Bandyopadhyay, Pathological and immunohistochemical study of experimental peste des petits  
443 ruminants virus infection in goats, *Journal of veterinary medicine. B, Infectious diseases and*  
444 *veterinary public health*, 51 (2004) 153-159.
- 445 [4] P. Saravanan, A. Sen, V. Balamurugan, K.K. Rajak, V. Bhanuprakash, K.S. Palaniswami, K.  
446 Nachimuthu, A. Thangavelu, G. Dhinakarraj, R. Hegde, R.K. Singh, Comparative efficacy of  
447 peste des petits ruminants (PPR) vaccines, *Biologicals : journal of the International Association*  
448 *of Biological Standardization*, 38 (2010) 479-485.
- 449 [5] N. Kumar, S. Maherchandani, S.K. Kashyap, S.V. Singh, S. Sharma, K.K. Chaubey, H. Ly,  
450 Peste des petits ruminants virus infection of small ruminants: a comprehensive review, *Viruses*, 6  
451 (2014) 2287-2327.
- 452 [6] S. Manjunath, G.R. Kumar, B.P. Mishra, B. Mishra, A.P. Sahoo, C.G. Joshi, A.K. Tiwari,  
453 K.K. Rajak, S.C. Janga, Genomic analysis of host - Peste des petits ruminants vaccine viral  
454 transcriptome uncovers transcription factors modulating immune regulatory pathways,  
455 *Veterinary research*, 46 (2015) 15.
- 456 [7] S. Manjunath, B.P. Mishra, B. Mishra, A.P. Sahoo, A.K. Tiwari, K.K. Rajak, D.  
457 Muthuchelvan, S. Saxena, L. Santra, A.R. Sahu, S.A. Wani, R.P. Singh, Y.P. Singh, A. Pandey,  
458 S. Kanchan, R.K. Singh, G.R. Kumar, S.C. Janga, Comparative and temporal transcriptome  
459 analysis of peste des petits ruminants virus infected goat peripheral blood mononuclear cells,  
460 *Virus research*, 229 (2017) 28-40.
- 461 [8] J. Birch, N. Juleff, M.P. Heaton, T. Kalbfleisch, J. Kijas, D. Bailey, Characterization of ovine  
462 Nectin-4, a novel peste des petits ruminants virus receptor, *Journal of virology*, 87 (2013) 4756-  
463 4761.
- 464 [9] R.A. Pope, S. Parida, D. Bailey, J. Brownlie, T. Barrett, A.C. Banyard, Early events  
465 following experimental infection with Peste-Des-Petits ruminants virus suggest immune cell  
466 targeting, *PloS one*, 8 (2013) e55830.
- 467 [10] Z.A. Nizamani, R. Servan de Almeida, E. Albina, F. Parveen, G. Libeau, In vitro study of  
468 lymphotropic and immunomodulatory properties of the peste des petits ruminants virus (pprv),  
469 *JAPS - Journal of Animal and Plant Sciences (Faisalabad)*, 24 (2014) 1380-1387.
- 470 [11] R.M. Pawar, G. Dhinakar Raj, C. Balachandran, Relationship between the level of signaling  
471 lymphocyte activation molecule mRNA and replication of Peste-des-petits-ruminants virus in  
472 peripheral blood mononuclear cells of host animals, *Acta virologica*, 52 (2008) 231-236.

- 473 [12] N. Subramanian, P. Torabi-Parizi, R.A. Gottschalk, R.N. Germain, B. Dutta, Network  
474 representations of immune system complexity, *Wiley interdisciplinary reviews. Systems biology*  
475 *and medicine*, 7 (2015) 13-38.
- 476 [13] K.L. Hoek, P. Samir, L.M. Howard, X. Niu, N. Prasad, A. Galassie, Q. Liu, T.M. Allos,  
477 K.A. Floyd, Y. Guo, Y. Shyr, S.E. Levy, S. Joyce, K.M. Edwards, A.J. Link, A cell-based  
478 systems biology assessment of human blood to monitor immune responses after influenza  
479 vaccination, *PloS one*, 10 (2015) e0118528.
- 480 [14] S. Ruscanu, L. Jouneau, C. Urien, M. Bourge, J. Lecardonnel, M. Moroldo, B. Loup, M.  
481 Dalod, J. Elhmouzi-Younes, C. Bevilacqua, J. Hope, D. Vitour, S. Zientara, G. Meyer, I.  
482 Schwartz-Cornil, Dendritic cell subtypes from lymph nodes and blood show contrasted gene  
483 expression programs upon Bluetongue virus infection, *Journal of virology*, 87 (2013) 9333-9343.
- 484 [15] H.I. Nakaya, J. Wrammert, E.K. Lee, L. Racioppi, S. Marie-Kunze, W.N. Haining, A.R.  
485 Means, S.P. Kasturi, N. Khan, G.M. Li, M. McCausland, V. Kanchan, K.E. Kokko, S. Li, R.  
486 Elbein, A.K. Mehta, A. Aderem, K. Subbarao, R. Ahmed, B. Pulendran, Systems biology of  
487 vaccination for seasonal influenza in humans, *Nature immunology*, 12 (2011) 786-795.
- 488 [16] B. Pulendran, S. Li, H.I. Nakaya, Systems vaccinology, *Immunity*, 33 (2010) 516-529.
- 489 [17] T. Hagan, H.I. Nakaya, S. Subramaniam, B. Pulendran, Systems vaccinology: Enabling  
490 rational vaccine design with systems biological approaches, *Vaccine*, 33 (2015) 5294-5301.
- 491 [18] Y. Zhang, K. Chen, S.A. Sloan, M.L. Bennett, A.R. Scholze, S. O'Keefe, H.P. Phatnani, P.  
492 Guarnieri, C. Caneda, N. Ruderisch, S. Deng, S.A. Liddelow, C. Zhang, R. Daneman, T.  
493 Maniatis, B.A. Barres, J.Q. Wu, An RNA-sequencing transcriptome and splicing database of  
494 glia, neurons, and vascular cells of the cerebral cortex, *The Journal of neuroscience : the official*  
495 *journal of the Society for Neuroscience*, 34 (2014) 11929-11947.
- 496 [19] G. Dhinakar Raj, K. Nachimuthu, A. Mahalinga Nainar, A simplified objective method for  
497 quantification of peste des petits ruminants virus or neutralizing antibody, *Journal of virological*  
498 *methods*, 89 (2000) 89-95.
- 499 [20] R.P. Singh, B.P. Sreenivasa, P. Dhar, L.C. Shah, S.K. Bandyopadhyay, Development of a  
500 monoclonal antibody based competitive-ELISA for detection and titration of antibodies to peste  
501 des petits ruminants (PPR) virus, *Veterinary microbiology*, 98 (2004) 3-15.
- 502 [21] S.A. Wani, A.R. Sahu, S. Saxena, K.K. Rajak, M. Saminathan, A.P. Sahoo, S. Kanchan, A.  
503 Pandey, B. Mishra, D. Muthuchelvan, A.K. Tiwari, B.P. Mishra, R.K. Singh, R.K. Gandham,  
504 Expression kinetics of ISG15, IRF3, IFN $\gamma$ , IL10, IL2 and IL4 genes vis-a-vis virus  
505 shedding, tissue tropism and antibody dynamics in PPRV vaccinated, challenged, infected sheep  
506 and goats, *Microbial pathogenesis*, 117 (2018) 206-218.
- 507 [22] R. Schmieder, R. Edwards, Quality control and preprocessing of metagenomic datasets,  
508 *Bioinformatics*, 27 (2011) 863-864.
- 509 [23] B. Li, C.N. Dewey, RSEM: accurate transcript quantification from RNA-Seq data with or  
510 without a reference genome, *BMC bioinformatics*, 12 (2011) 323.
- 511 [24] S.A. Wani, A.R. Sahu, R.I.N. Khan, A. Pandey, S. Saxena, N. Hosamani, W.A. Malla, D.  
512 Chaudhary, S. Kanchan, V. Sah, K.K. Rajak, D. Muthuchelvan, B. Mishra, A.K. Tiwari, A.P.  
513 Sahoo, B. Sajjanar, Y.P. Singh, R.K. Gandham, B.P. Mishra, R.K. Singh, Contrasting Gene  
514 Expression Profiles of Monocytes and Lymphocytes From Peste-Des-Petits-Ruminants Virus  
515 Infected Goats, *Frontiers in immunology*, 10 (2019) 1463.
- 516 [25] W.M. Schneider, M.D. Chevillotte, C.M. Rice, Interferon-stimulated genes: a complex web  
517 of host defenses, *Annual review of immunology*, 32 (2014) 513-545.

- 518 [26] S. Manjunath, S. Saxena, B. Mishra, L. Santra, A.R. Sahu, S.A. Wani, A.K. Tiwari, B.P.  
519 Mishra, R.K. Singh, S.C. Janga, G.R. Kumar, Early transcriptome profile of goat peripheral  
520 blood mononuclear cells (PBMCs) infected with peste des petits ruminant's vaccine virus  
521 (Sungri/96) revealed induction of antiviral response in an interferon independent manner,  
522 *Research in veterinary science*, 124 (2019) 166-177.
- 523 [27] D. Szklarczyk, A.L. Gable, D. Lyon, A. Junge, S. Wyder, J. Huerta-Cepas, M. Simonovic,  
524 N.T. Doncheva, J.H. Morris, P. Bork, L.J. Jensen, C.V. Mering, STRING v11: protein-protein  
525 association networks with increased coverage, supporting functional discovery in genome-wide  
526 experimental datasets, *Nucleic acids research*, 47 (2019) D607-D613.
- 527 [28] G. Csárdi, T. Nepusz, The igraph software package for complex network research, in, 2006.
- 528 [29] P. Shannon, A. Markiel, O. Ozier, N.S. Baliga, J.T. Wang, D. Ramage, N. Amin, B.  
529 Schwikowski, T. Ideker, Cytoscape: a software environment for integrated models of  
530 biomolecular interaction networks, *Genome research*, 13 (2003) 2498-2504.
- 531 [30] S. Manjunath, B. Mishra, B.P. Mishra, S. Saxena, P. Mondal, A.R. Sahu, A.P. Sahoo, A.K.  
532 Tiwari, R.K. Gandham, Identification of suitable reference gene in goat peripheral blood  
533 mononuclear cells (PBMCs) infected with peste des petits ruminants virus (PPRV), *Livestock  
534 Science*, 181 (2015) 150-155.
- 535 [31] T.D. Schmittgen, K.J. Livak, Analyzing real-time PCR data by the comparative C(T)  
536 method, *Nature protocols*, 3 (2008) 1101-1108.
- 537 [32] H. Kato, S. Sato, M. Yoneyama, M. Yamamoto, S. Uematsu, K. Matsui, T. Tsujimura, K.  
538 Takeda, T. Fujita, O. Takeuchi, S. Akira, Cell type-specific involvement of RIG-I in antiviral  
539 response, *Immunity*, 23 (2005) 19-28.
- 540 [33] R.B. Seth, L. Sun, C.K. Ea, Z.J. Chen, Identification and characterization of MAVS, a  
541 mitochondrial antiviral signaling protein that activates NF-kappaB and IRF 3, *Cell*, 122 (2005)  
542 669-682.
- 543 [34] H.X. Zhang, Z.X. Liu, Y.P. Sun, J. Zhu, S.Y. Lu, X.S. Liu, Q.H. Huang, Y.Y. Xie, H.B.  
544 Zhu, S.Y. Dang, H.F. Chen, G.Y. Zheng, Y.X. Li, Y. Kuang, J. Fei, S.J. Chen, Z. Chen, Z.G.  
545 Wang, RIG-I regulates NF-kappaB activity through binding to Nf-kappab1 3'-UTR mRNA,  
546 *Proceedings of the National Academy of Sciences of the United States of America*, 110 (2013)  
547 6459-6464.
- 548 [35] S. Jensen, A.R. Thomsen, Sensing of RNA viruses: a review of innate immune receptors  
549 involved in recognizing RNA virus invasion, *Journal of virology*, 86 (2012) 2900-2910.
- 550 [36] P.N. Moynagh, TLR signalling and activation of IRFs: revisiting old friends from the NF-  
551 kappaB pathway, *Trends in immunology*, 26 (2005) 469-476.
- 552 [37] T. Liu, L. Zhang, D. Joo, S.C. Sun, NF-kappaB signaling in inflammation, *Signal  
553 transduction and targeted therapy*, 2 (2017).
- 554 [38] M.L. Kapsenberg, Dendritic-cell control of pathogen-driven T-cell polarization, *Nature  
555 reviews. Immunology*, 3 (2003) 984-993.
- 556 [39] S. Hodgson, K. Moffat, H. Hill, J.T. Flannery, S.P. Graham, M.D. Baron, K.E. Darpel,  
557 Comparison of the Immunogenicities and Cross-Lineage Efficacies of Live Attenuated Peste des  
558 Petits Ruminants Virus Vaccines PPRV/Nigeria/75/1 and PPRV/Sungri/96, *Journal of virology*,  
559 92 (2018).
- 560 [40] R.L. Coffman, A. Sher, R.A. Seder, Vaccine adjuvants: putting innate immunity to work,  
561 *Immunity*, 33 (2010) 492-503.
- 562 [41] S. Lee, M.T. Nguyen, Recent advances of vaccine adjuvants for infectious diseases,  
563 *Immune network*, 15 (2015) 51-57.



- 564 [42] D.T. O'Hagan, C.B. Fox, New generation adjuvants--from empiricism to rational design,  
565 *Vaccine*, 33 Suppl 2 (2015) B14-20.
- 566 [43] C. Maisonneuve, S. Bertholet, D.J. Philpott, E. De Gregorio, Unleashing the potential of  
567 NOD- and Toll-like agonists as vaccine adjuvants, *Proceedings of the National Academy of*  
568 *Sciences of the United States of America*, 111 (2014) 12294-12299.
- 569 [44] A. Iwasaki, R. Medzhitov, Regulation of adaptive immunity by the innate immune system,  
570 *Science*, 327 (2010) 291-295.
- 571 [45] T. Querec, S. Bennouna, S. Alkan, Y. Laouar, K. Gordon, R. Flavell, S. Akira, R. Ahmed,  
572 B. Pulendran, Yellow fever vaccine YF-17D activates multiple dendritic cell subsets via TLR2,  
573 7, 8, and 9 to stimulate polyvalent immunity, *The Journal of experimental medicine*, 203 (2006)  
574 413-424.
- 575 [46] C.G. Vinuesa, S.G. Tangye, B. Moser, C.R. Mackay, Follicular B helper T cells in antibody  
576 responses and autoimmunity, *Nature reviews. Immunology*, 5 (2005) 853-865.
- 577 [47] B. Pulendran, R. Ahmed, Immunological mechanisms of vaccination, *Nature immunology*,  
578 12 (2011) 509-517.
- 579 [48] M. Bermejo-Jambrina, J. Eder, L.C. Helgers, N. Hertoghs, B.M. Nijmeijer, M. Stunnenberg,  
580 T.B.H. Geijtenbeek, C-Type Lectin Receptors in Antiviral Immunity and Viral Escape, *Frontiers*  
581 *in immunology*, 9 (2018) 590.
- 582 [49] S. Paust, B. Senman, U.H. von Andrian, Adaptive immune responses mediated by natural  
583 killer cells, *Immunological reviews*, 235 (2010) 286-296.
- 584 [50] T.D. Querec, R.S. Akondy, E.K. Lee, W. Cao, H.I. Nakaya, D. Teuwen, A. Pirani, K.  
585 Gernert, J. Deng, B. Marzolf, K. Kennedy, H. Wu, S. Bennouna, H. Oluoch, J. Miller, R.Z.  
586 Vencio, M. Mulligan, A. Aderem, R. Ahmed, B. Pulendran, Systems biology approach predicts  
587 immunogenicity of the yellow fever vaccine in humans, *Nature immunology*, 10 (2009) 116-125.
- 588 [51] S.M. Vidal, S.I. Khakoo, C.A. Biron, Natural killer cell responses during viral infections:  
589 flexibility and conditioning of innate immunity by experience, *Current opinion in virology*, 1  
590 (2011) 497-512.
- 591 [52] Q. Xue, Y. Yan, R. Zhang, H. Xiong, Regulation of iNOS on Immune Cells and Its Role in  
592 Diseases, *International journal of molecular sciences*, 19 (2018).
- 593 [53] J.R. Dunkelberger, W.C. Song, Complement and its role in innate and adaptive immune  
594 responses, *Cell research*, 20 (2010) 34-50.
- 595 [54] P.J. Farrell, R.J. Broeze, P. Lengyel, Accumulation of an mRNA and protein in interferon-  
596 treated Ehrlich ascites tumour cells, *Nature*, 279 (1979) 523-525.
- 597 [55] S. Memet, F. Besancon, M.F. Bourgeade, M.N. Thang, Direct induction of interferon-  
598 gamma- and interferon-alpha/beta-inducible genes by double-stranded RNA, *Journal of*  
599 *interferon research*, 11 (1991) 131-141.
- 600 [56] Y.J. Jeon, H.M. Yoo, C.H. Chung, ISG15 and immune diseases, *Biochimica et biophysica*  
601 *acta*, 1802 (2010) 485-496.
- 602 [57] L. Radoshevich, F. Impens, D. Ribet, J.J. Quereda, T. Nam Tham, M.A. Nahori, H. Bierne,  
603 O. Dussurget, J. Pizarro-Cerda, K.P. Knobeloch, P. Cossart, ISG15 counteracts *Listeria*  
604 *monocytogenes* infection, *eLife*, 4 (2015).
- 605 [58] C. Zhao, M.N. Collins, T.Y. Hsiang, R.M. Krug, Interferon-induced ISG15 pathway: an  
606 ongoing virus-host battle, *Trends in microbiology*, 21 (2013) 181-186.
- 607 [59] M. Albert, M. Becares, M. Falqui, C. Fernandez-Lozano, S. Guerra, ISG15, a Small  
608 Molecule with Huge Implications: Regulation of Mitochondrial Homeostasis, *Viruses*, 10  
609 (2018).



- 610 [60] G. Lu, J.T. Reinert, I. Pitha-Rowe, A. Okumura, M. Kellum, K.P. Knobeloch, B. Hassel,  
611 P.M. Pitha, ISG15 enhances the innate antiviral response by inhibition of IRF-3 degradation,  
612 *Cellular and molecular biology*, 52 (2006) 29-41.
- 613 [61] C. Villarroya-Beltri, S. Guerra, F. Sanchez-Madrid, ISGylation - a key to lock the cell gates  
614 for preventing the spread of threats, *Journal of cell science*, 130 (2017) 2961-2969.
- 615 [62] M. Kane, S.S. Yadav, J. Bitzegeio, S.B. Kutluay, T. Zang, S.J. Wilson, J.W. Schoggins,  
616 C.M. Rice, M. Yamashita, T. Hatzioannou, P.D. Bieniasz, MX2 is an interferon-induced  
617 inhibitor of HIV-1 infection, *Nature*, 502 (2013) 563-566.
- 618 [63] C. Goujon, O. Moncorge, H. Bauby, T. Doyle, C.C. Ward, T. Schaller, S. Hue, W.S.  
619 Barclay, R. Schulz, M.H. Malim, Human MX2 is an interferon-induced post-entry inhibitor of  
620 HIV-1 infection, *Nature*, 502 (2013) 559-562.
- 621 [64] Z. Liu, Q. Pan, S. Ding, J. Qian, F. Xu, J. Zhou, S. Cen, F. Guo, C. Liang, The interferon-  
622 inducible MxB protein inhibits HIV-1 infection, *Cell host & microbe*, 14 (2013) 398-410.
- 623 [65] V. Fensterl, G.C. Sen, Interferon-induced Ifit proteins: their role in viral pathogenesis,  
624 *Journal of virology*, 89 (2015) 2462-2468.
- 625 [66] J.Y. Seo, R. Yaneva, E.R. Hinson, P. Cresswell, Human cytomegalovirus directly induces  
626 the antiviral protein viperin to enhance infectivity, *Science*, 332 (2011) 1093-1097.
- 627 [67] N. Nasr, S. Maddocks, S.G. Turville, A.N. Harman, N. Woolger, K.J. Helbig, J. Wilkinson,  
628 C.R. Bye, T.K. Wright, D. Rambukwelle, H. Donaghy, M.R. Beard, A.L. Cunningham, HIV-1  
629 infection of human macrophages directly induces viperin which inhibits viral production, *Blood*,  
630 120 (2012) 778-788.
- 631 [68] K.J. Helbig, N.S. Eyre, E. Yip, S. Narayana, K. Li, G. Fiches, E.M. McCartney, R.K.  
632 Jangra, S.M. Lemon, M.R. Beard, The antiviral protein viperin inhibits hepatitis C virus  
633 replication via interaction with nonstructural protein 5A, *Hepatology*, 54 (2011) 1506-1517.
- 634 [69] A.K. Santhosh, A.R. Gomes, R. Hegde, D. Rathnamma, B.M. Veeregowda, S.M.  
635 Byregowda, C. Renukprasad, V. Bhanuprakash, K. Prabhudas, N.R. Hegde, S. Isloor,  
636 Comparative immunogenicity of two peste des petitis ruminants (PPR) vaccines in South Indian  
637 sheep and goats under field conditions, *Indian journal of virology : an official organ of Indian*  
638 *Virological Society*, 24 (2013) 373-379.

639

640

## 641 **Legends**

642 **Figure 1:** Workflow for RNA sequencing data analysis

643 **Figure 2:** Number of dysregulated DEGs in PBMC subsets (A) Goats and (B) Sheep.  
644 Green colour represents downregulation and red colour represents upregulation.  
645 (C)Venn diagrams representing unique/common DEGs among cells in goats (D) Venn  
646 diagrams representing unique/common DEGs among cells in sheep

647 **Figure 3:** Functional annotation of DEGs involved in immunological processes for each  
648 subset of PBMCs: (A) CD4+, (B) CD8+, (C) CD14+, (D) CD21+ and (E) CD335+ using  
649 g:Profiler in Goats

650 **Figure 4:** Functional annotation of DEGs involved in immunological processes for each  
651 subset of PBMCs: (A) CD4+, (B) CD8+, (C) CD14+, (D) CD21+ and (E) CD335+ using  
652 g:Profiler in Sheep

653 **Figure 5:** Comparison analysis of canonical pathways related to immunological  
654 processes among the subsets of PBMCs in both sheep and goats using IPA. Blue  
655 colour represents Z score < 0 and red colour represents Z score > 0. Z score  $\geq 2$   
656 means activation of canonical pathways and Z score  $\leq -2$  means inactivation of  
657 canonical pathways

658 **Figure 6:** Comparison of significant enrichment (-log p value) of genes in cell mediated  
659 immune response and humoral immune response bio functions in (A) CD4+, (B) CD8+,  
660 (C) CD14+, (D) CD21+ and (E) NK cells (CD335+) between vaccinated goats and  
661 sheep.

662 **Figure 7:** Protein-protein interaction network of antiviral genes - IFIT3, ISG15, MX1,  
663 MX2, RSAD2, ISG20, IFIT5 and IFIT1 with the common DEGs across all subsets of  
664 each species (A) Goats and (B) Sheep. Size of circle indicates the degree of interaction.  
665 (C) Heatmap for fold change ( $\text{Log}_2\text{FC}$ ) values of DEGs involved in the network among  
666 the subsets of PBMCs of goats. (D) Heatmap for fold change ( $\text{Log}_2\text{FC}$ ) values of DEGs  
667 involved in the network among the subsets of PBMCs of sheep. Green colour indicates  
668 downregulation and red colour indicates upregulation.

669 **Supplementary Figure 1:** Purity of PBMCs subsets - T helper cells (CD4+), T cytotoxic  
670 cells (CD8+), monocytes (CD14+), B lymphocytes (CD21+), and natural killer cells  
671 (CD335+) by flow cytometry. 'PBMCs' means unstained cells. 'PBMC' with Ab' means  
672 before magnetic beads cell separation. Enriched cells mean post magnetic beads cell  
673 separation.

674 **Supplementary Figure 2:** Heatmap for fold change ( $\text{Log}_2\text{FC}$ ) value of common immune  
675 DEGs between goats and sheep for each subset of PBMCs: (A) CD4+, (B) CD8+, (C)  
676 CD14+, (D) CD21+ and (E) CD335+. Green colour indicates downregulation and red  
677 colour indicates upregulation.

678 **Supplementary Figure 3:** Functional annotation related to immunological processes of  
679 genes expressed in all the subsets or in one subset of PBMCs associated with innate  
680 immune response (A) Goats (B) Sheep

681 **Supplementary File 1:** Individual list of DEGs expressed in the subsets of goats and  
682 sheep

683 **Supplementary File 2:** List of 5512 and 5297 DEGs expressed across the subsets in  
684 goats and sheep, respectively

685

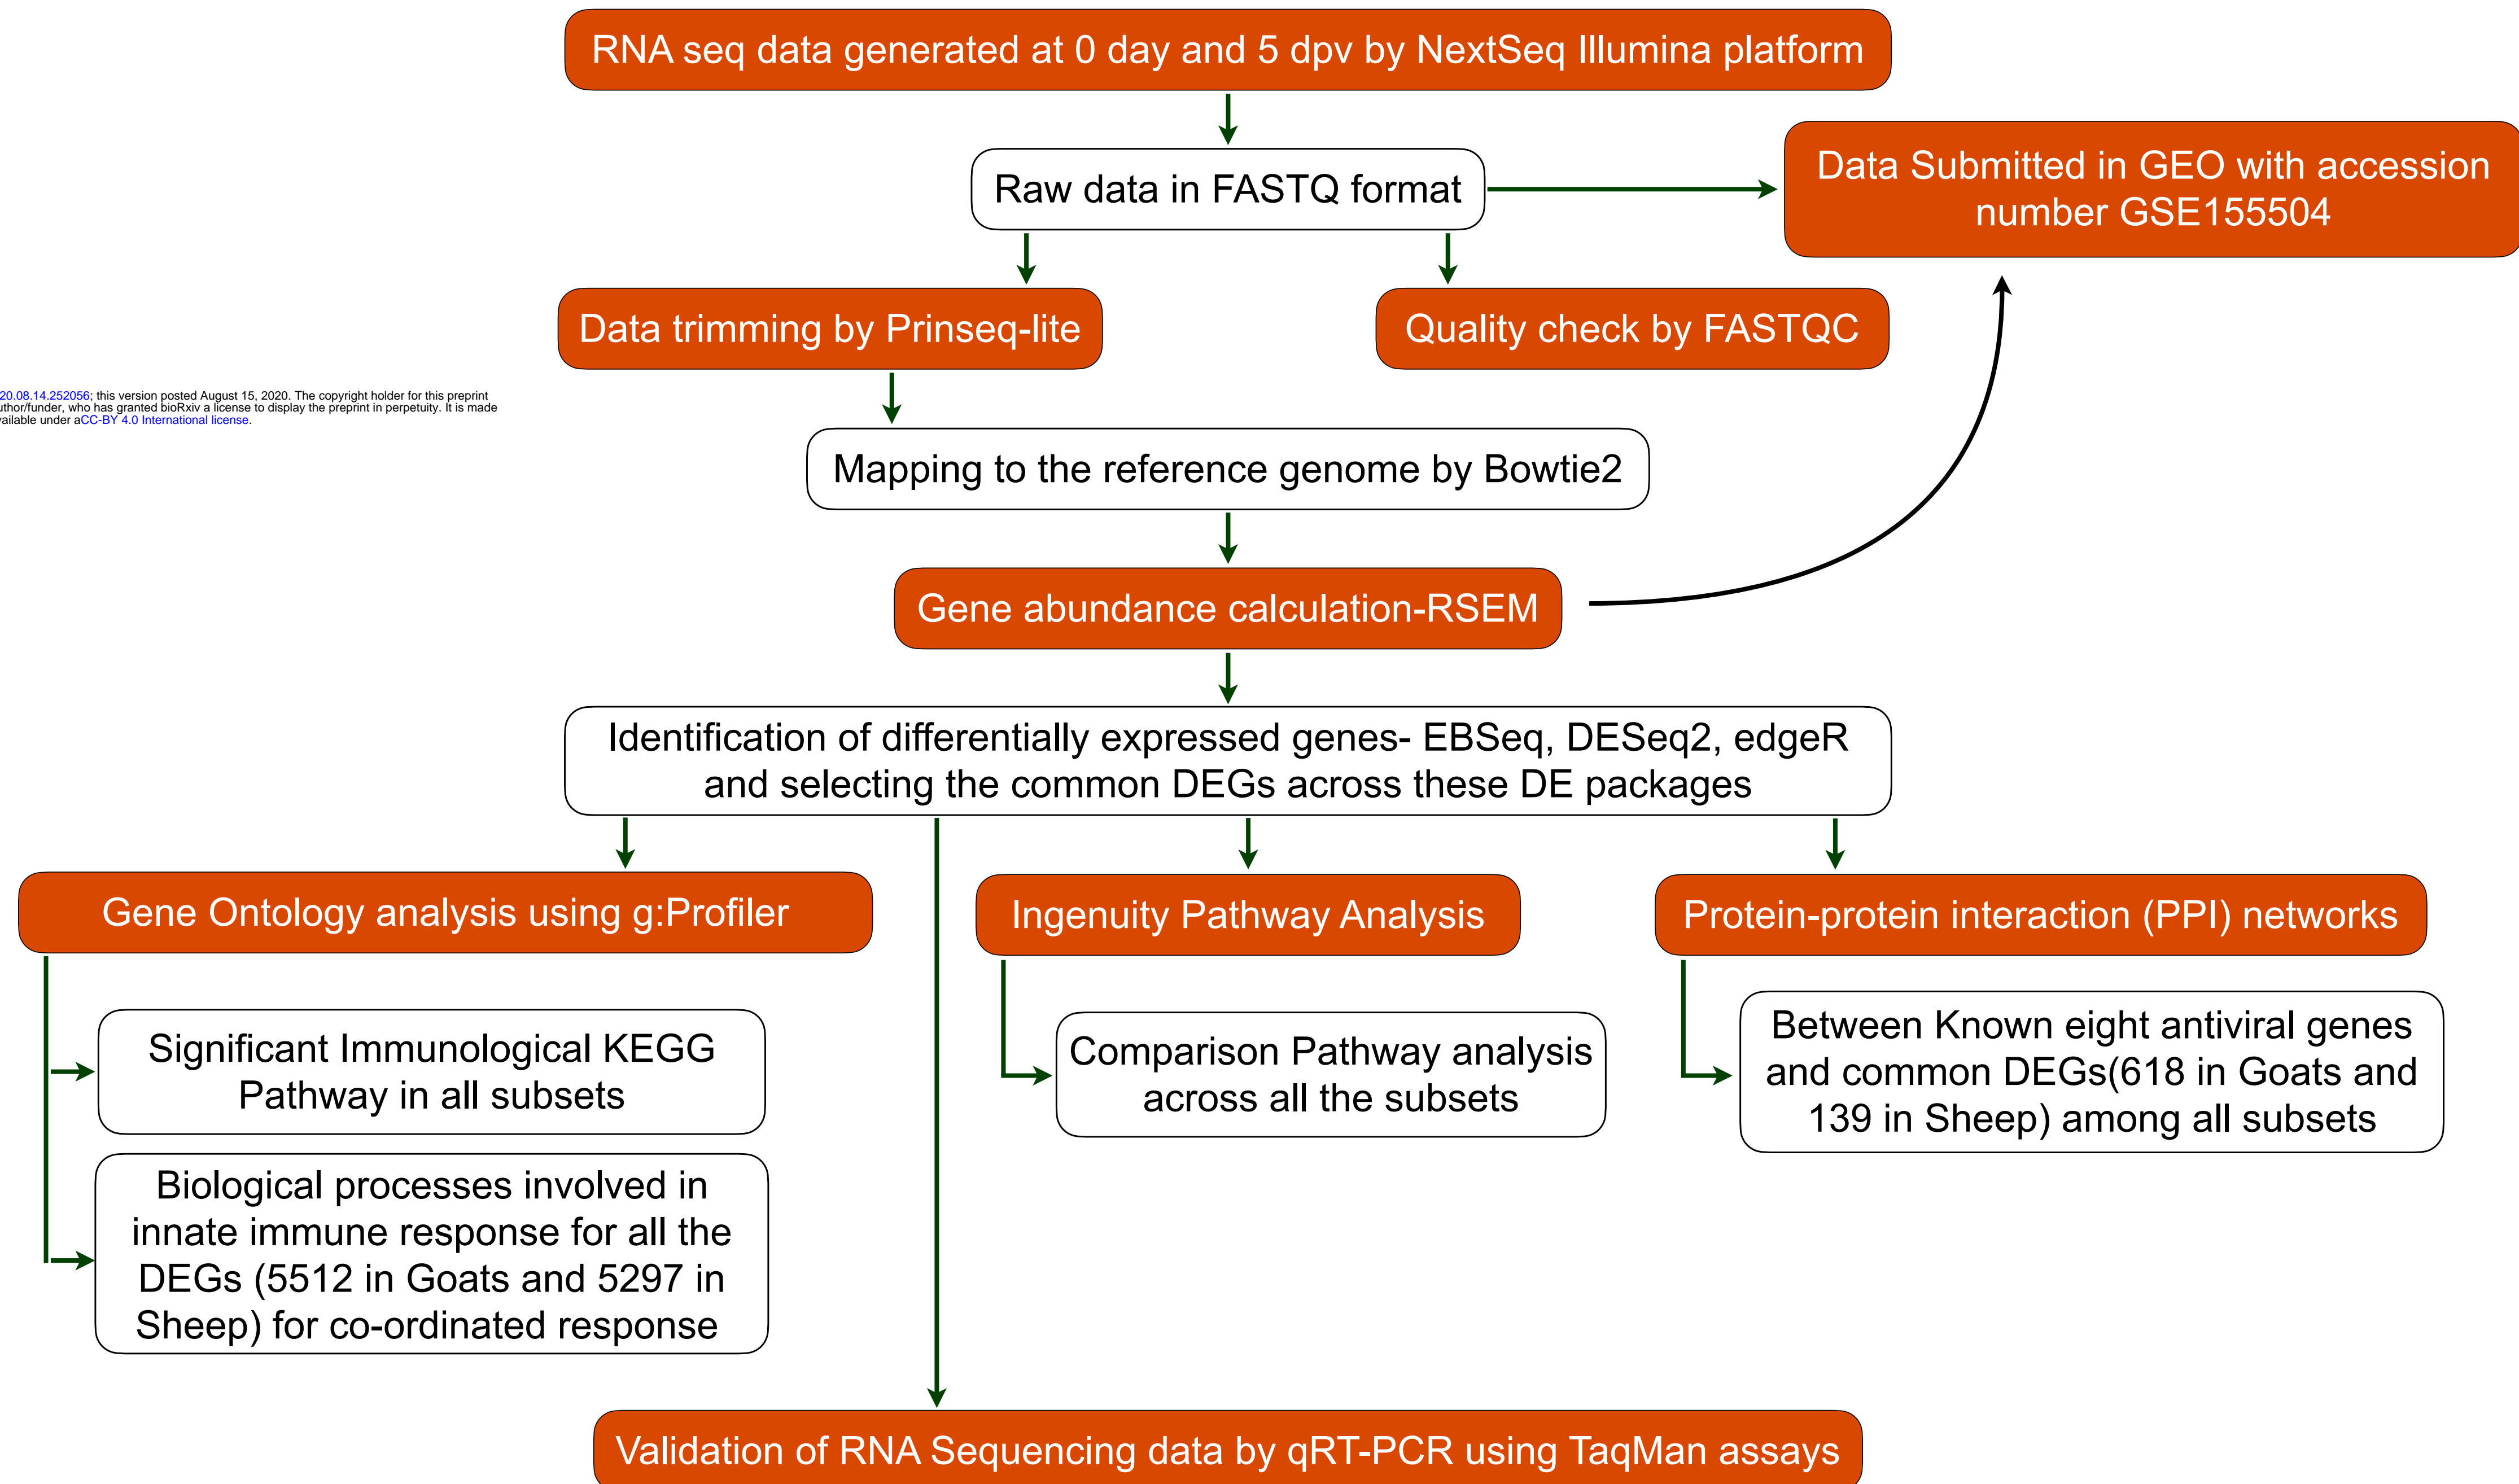

(A)

DEGs in Goat

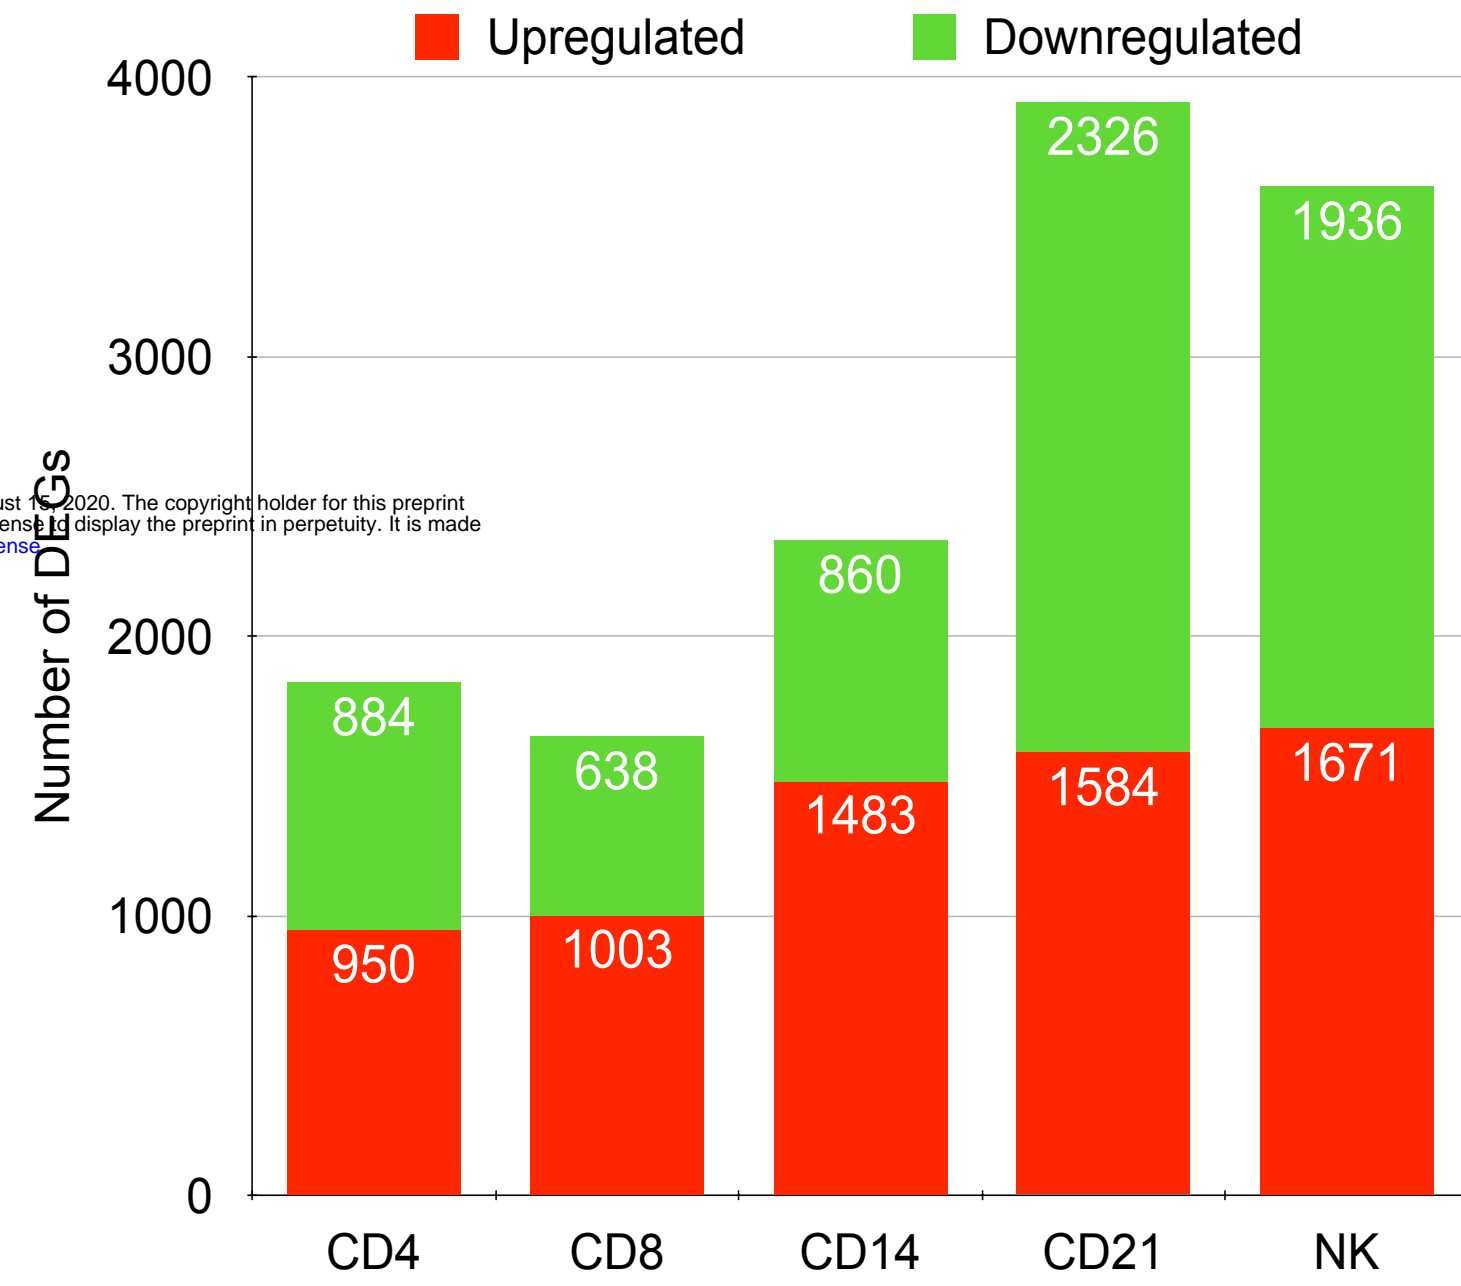

bioRxiv preprint doi: <https://doi.org/10.1101/2020.08.14.252056>; this version posted August 14, 2020. The copyright holder for this preprint (which was not certified by peer review) is the author/funder, who has granted bioRxiv a license to display the preprint in perpetuity. It is made available under aCC-BY 4.0 International license.

(B)

DEGs in Sheep

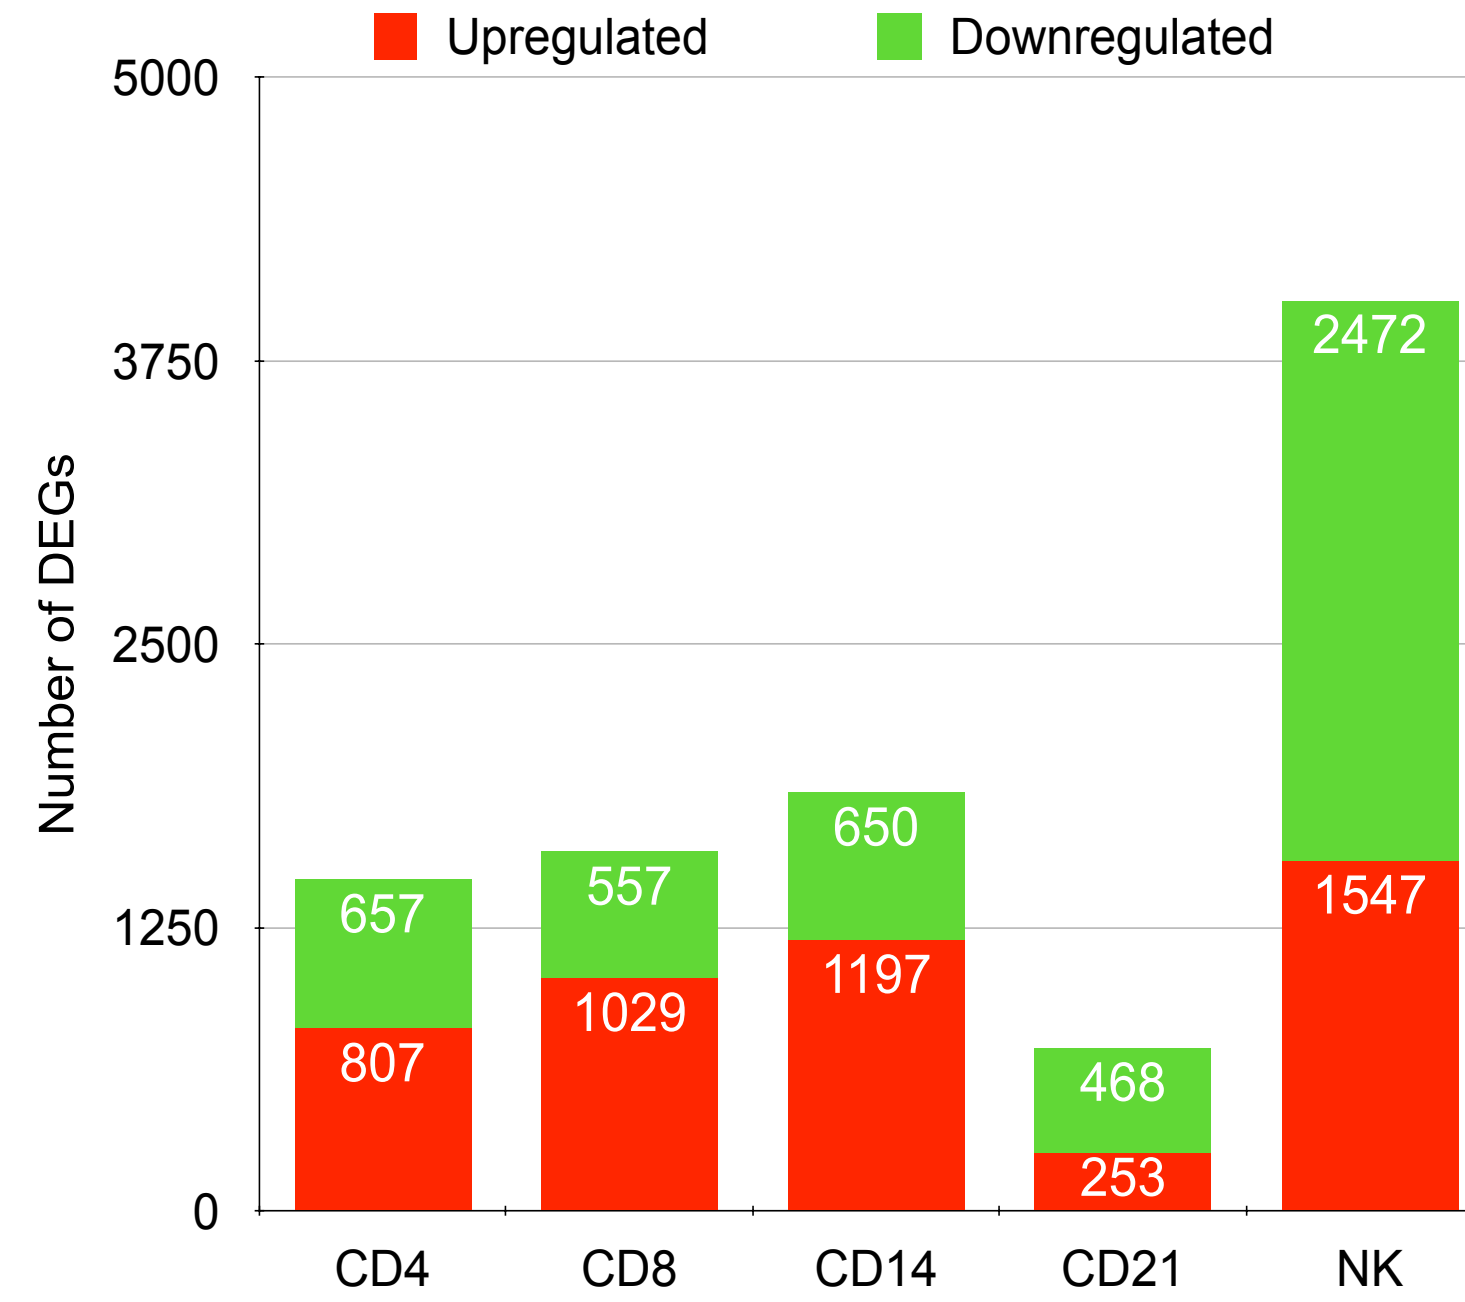

(C)

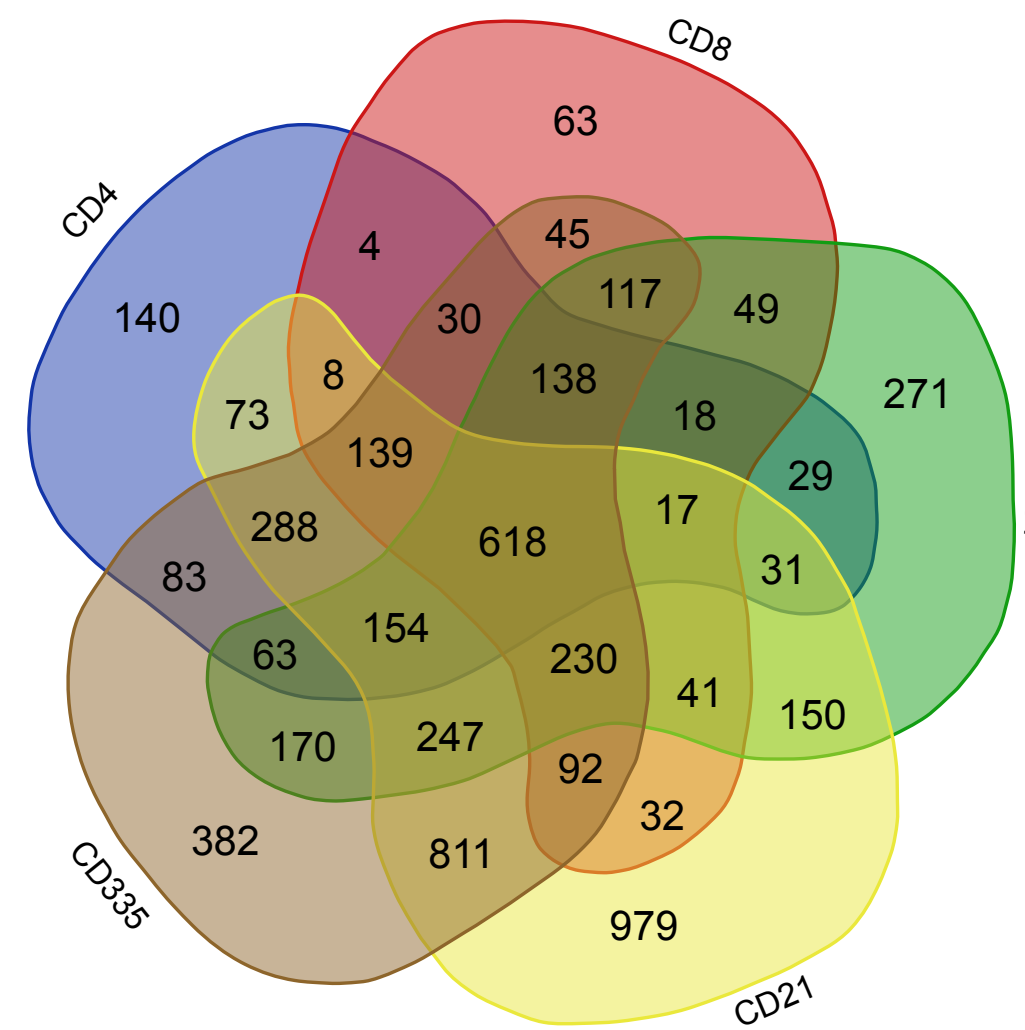

(D)

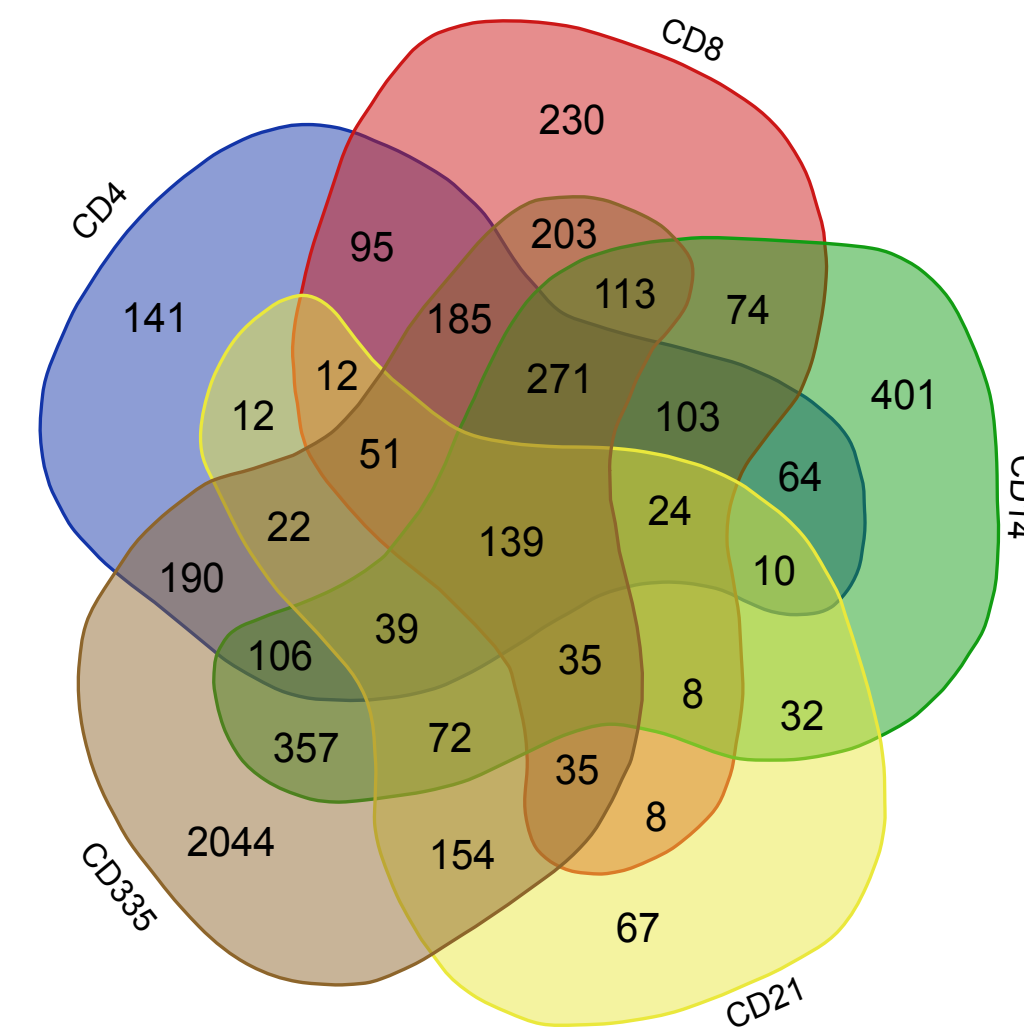



(A)

CD4+(Goat)

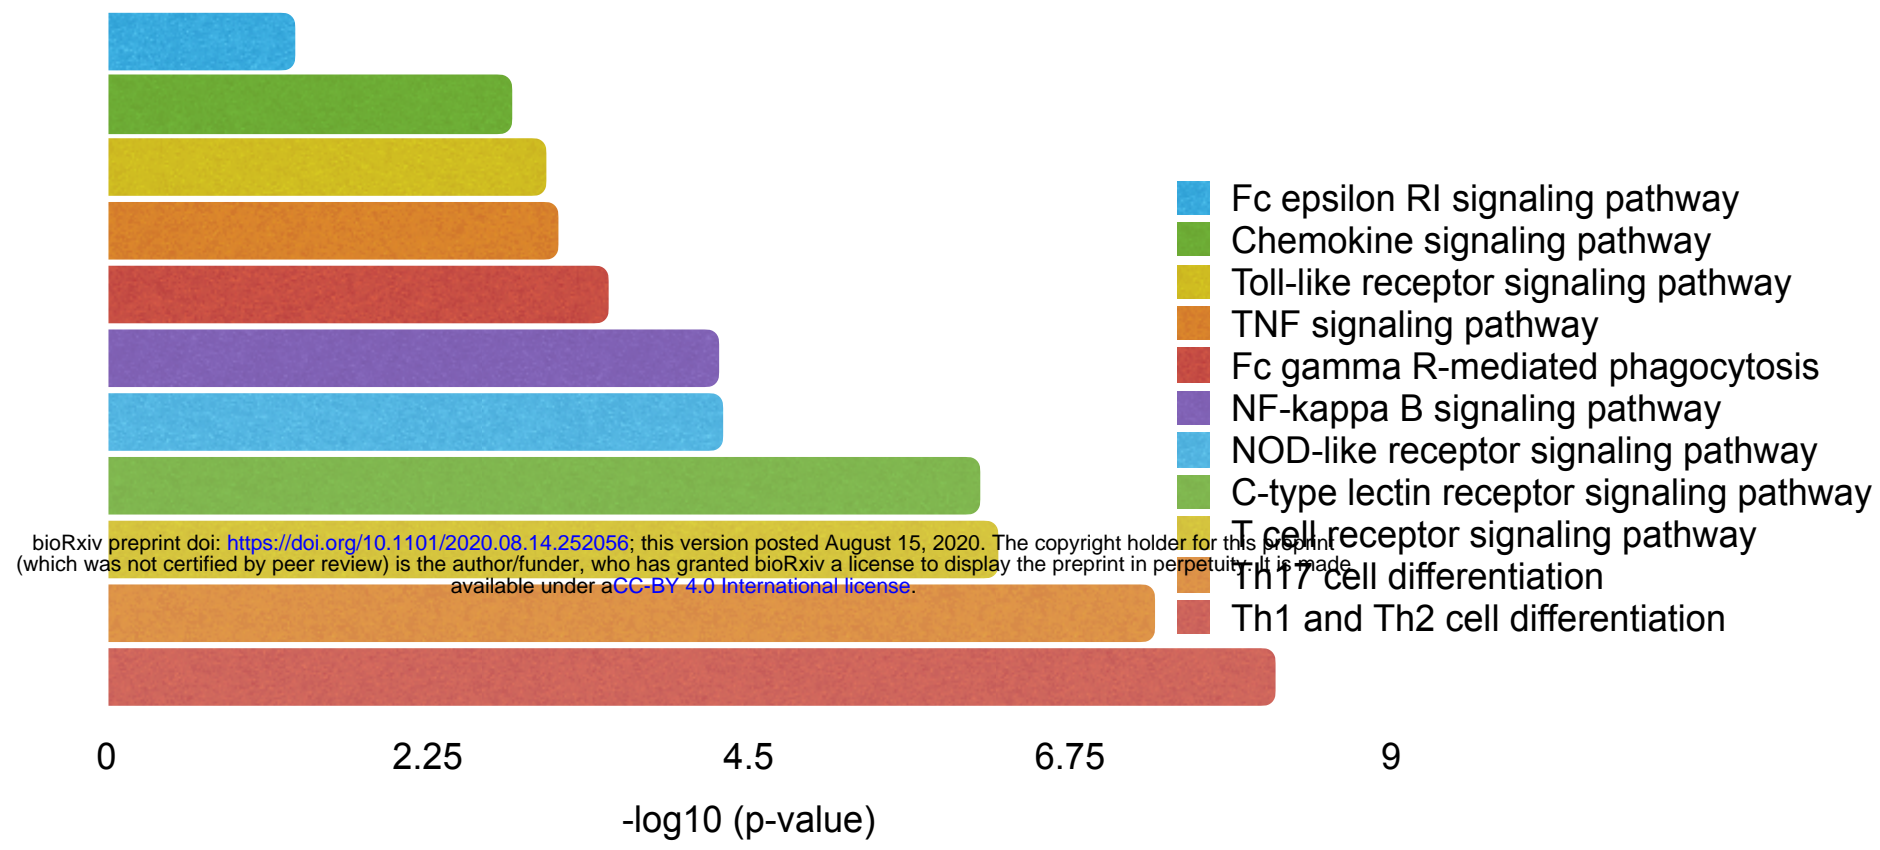

(B)

CD8+(Goat)

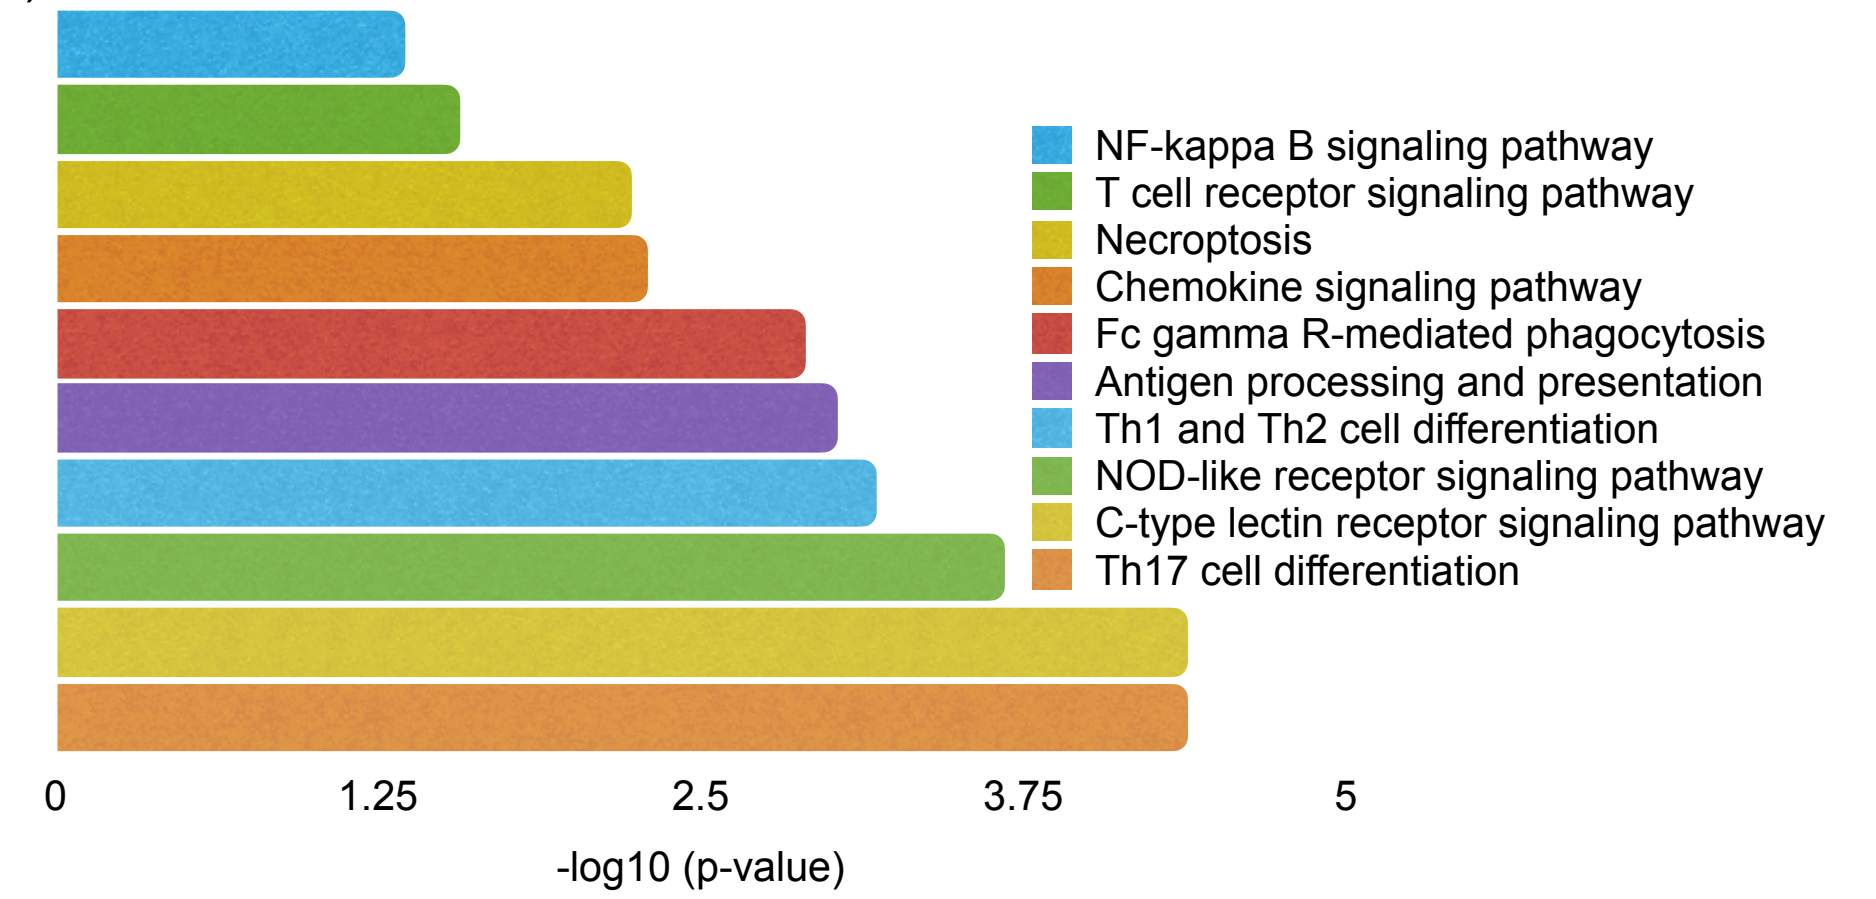

(C)

CD14+(Goat)

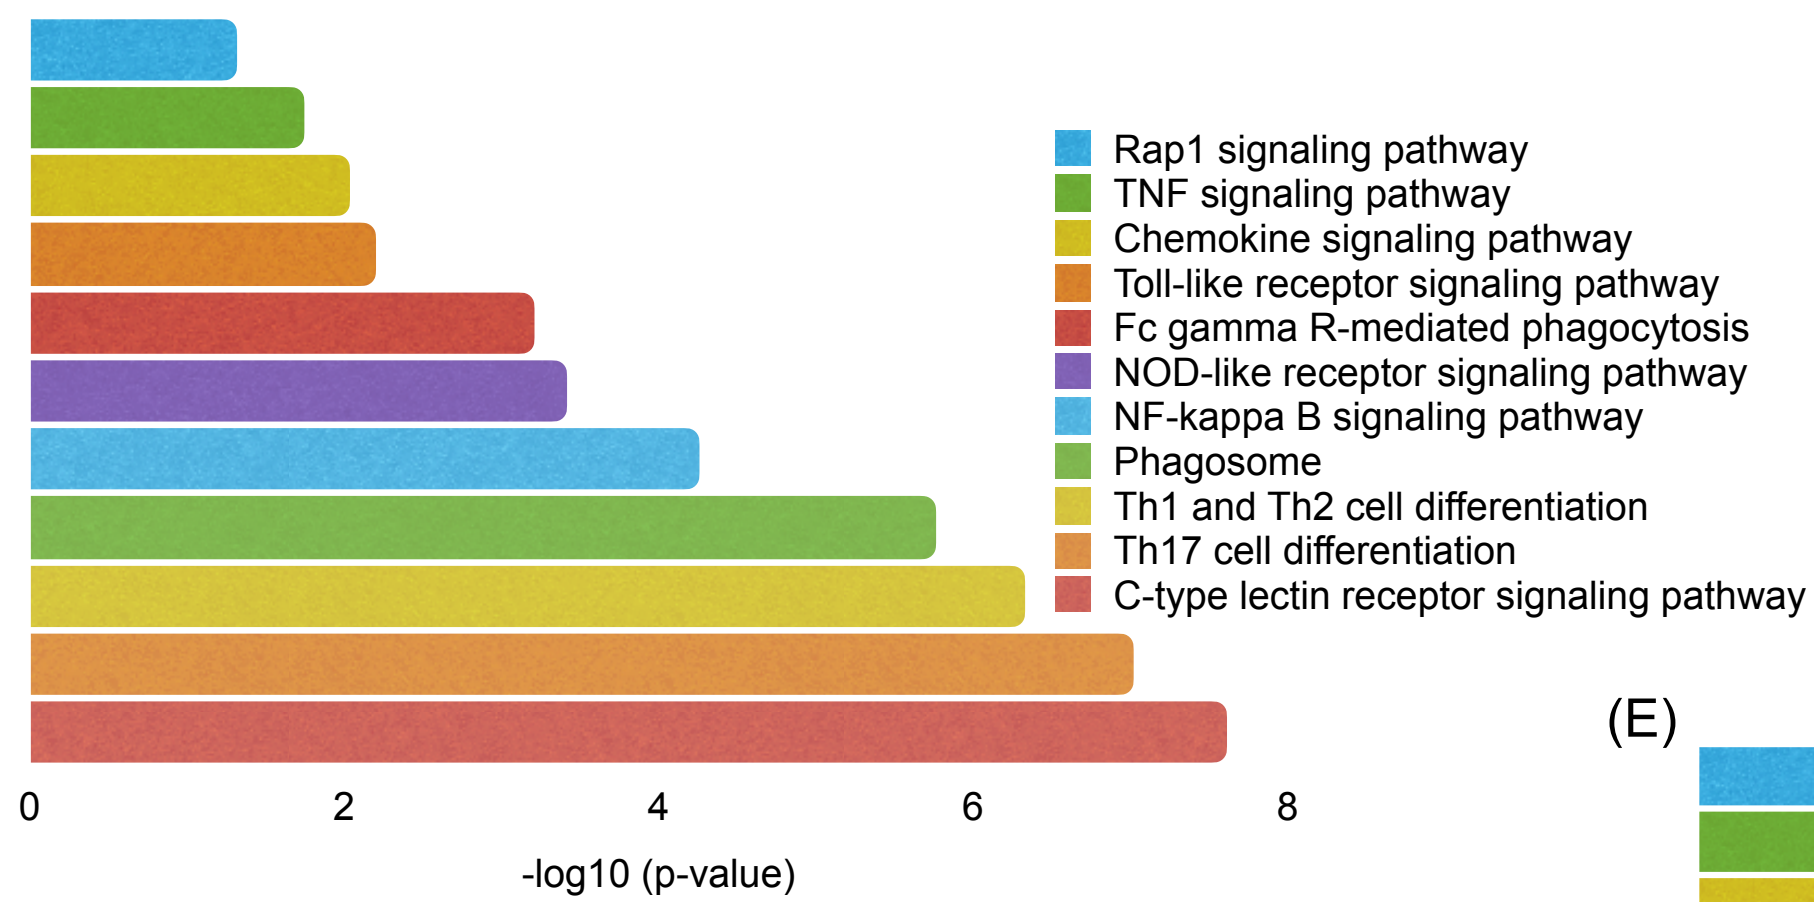

(D)

CD21+(Goat)

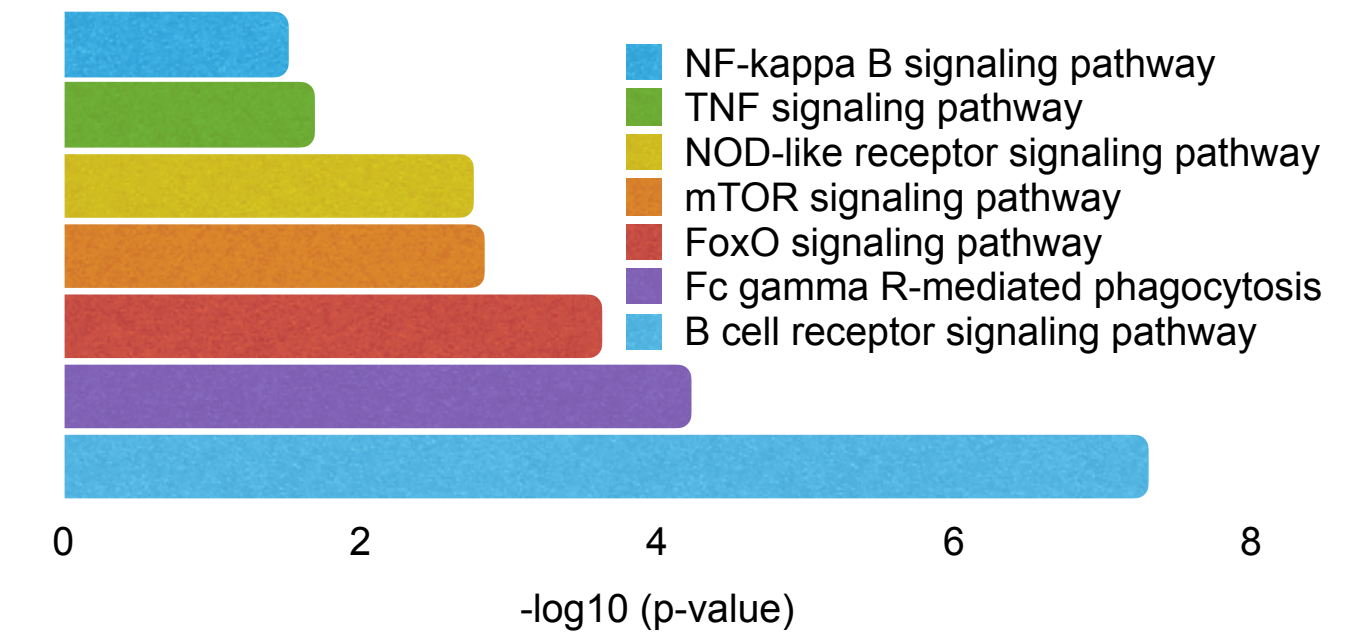

(E)

CD335+(Goat)

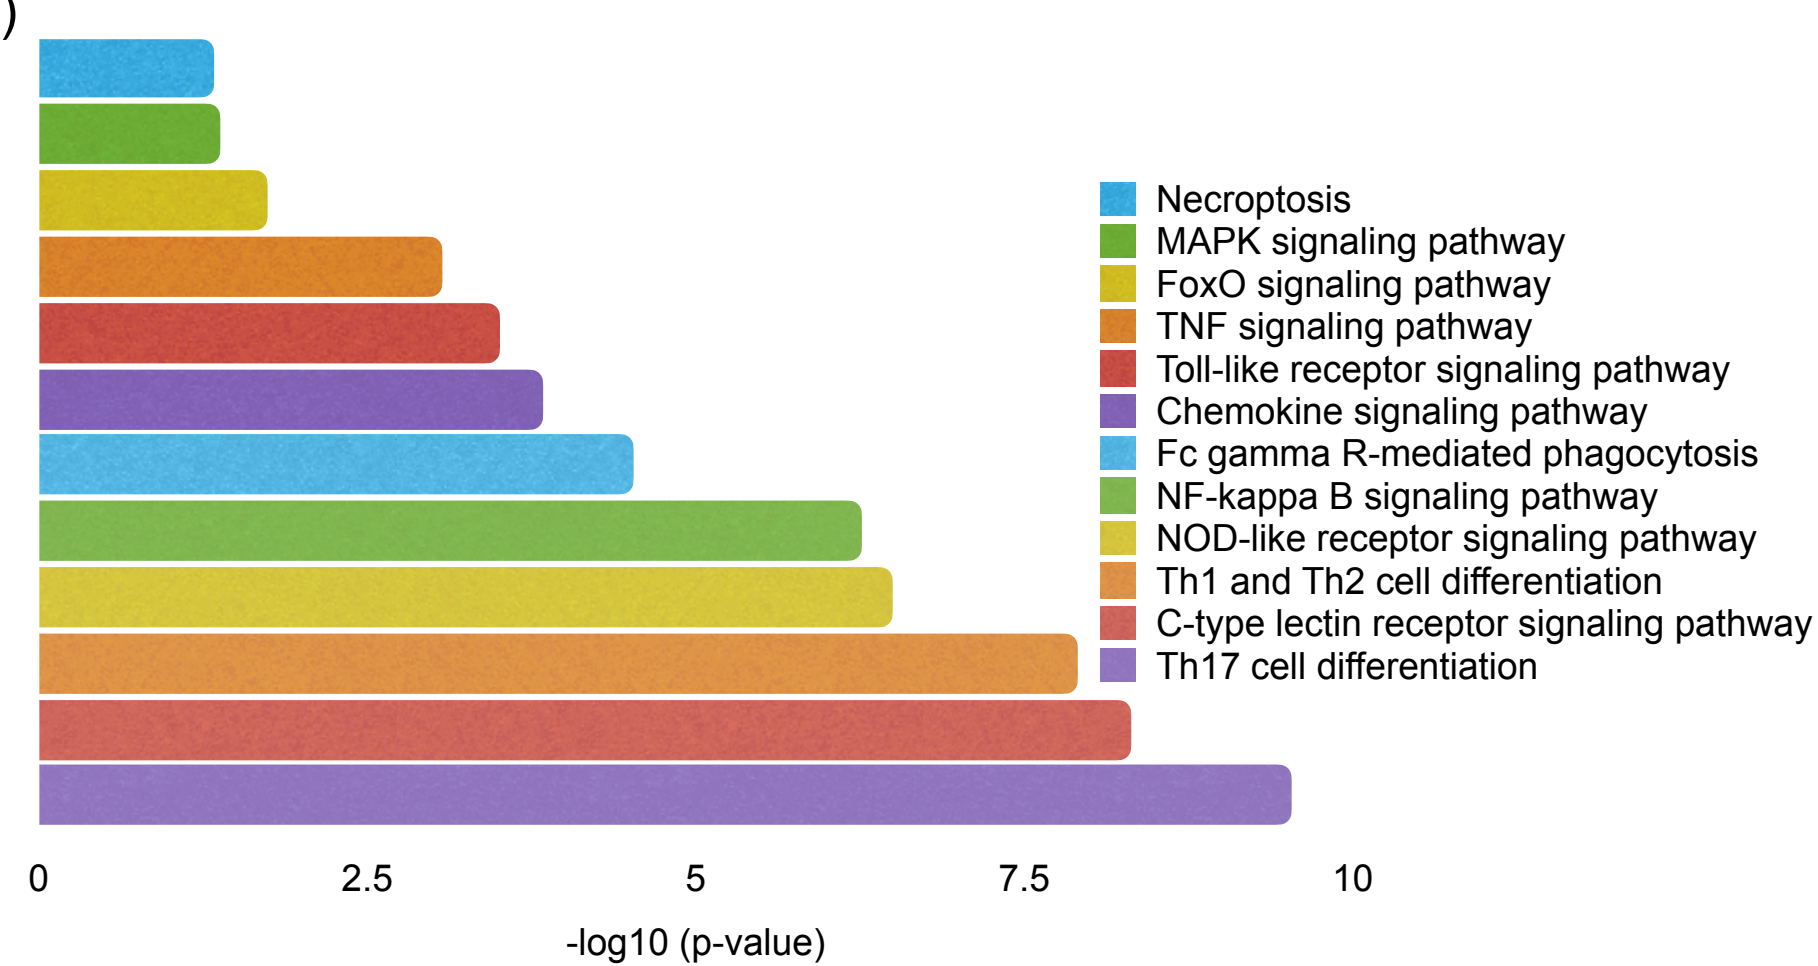



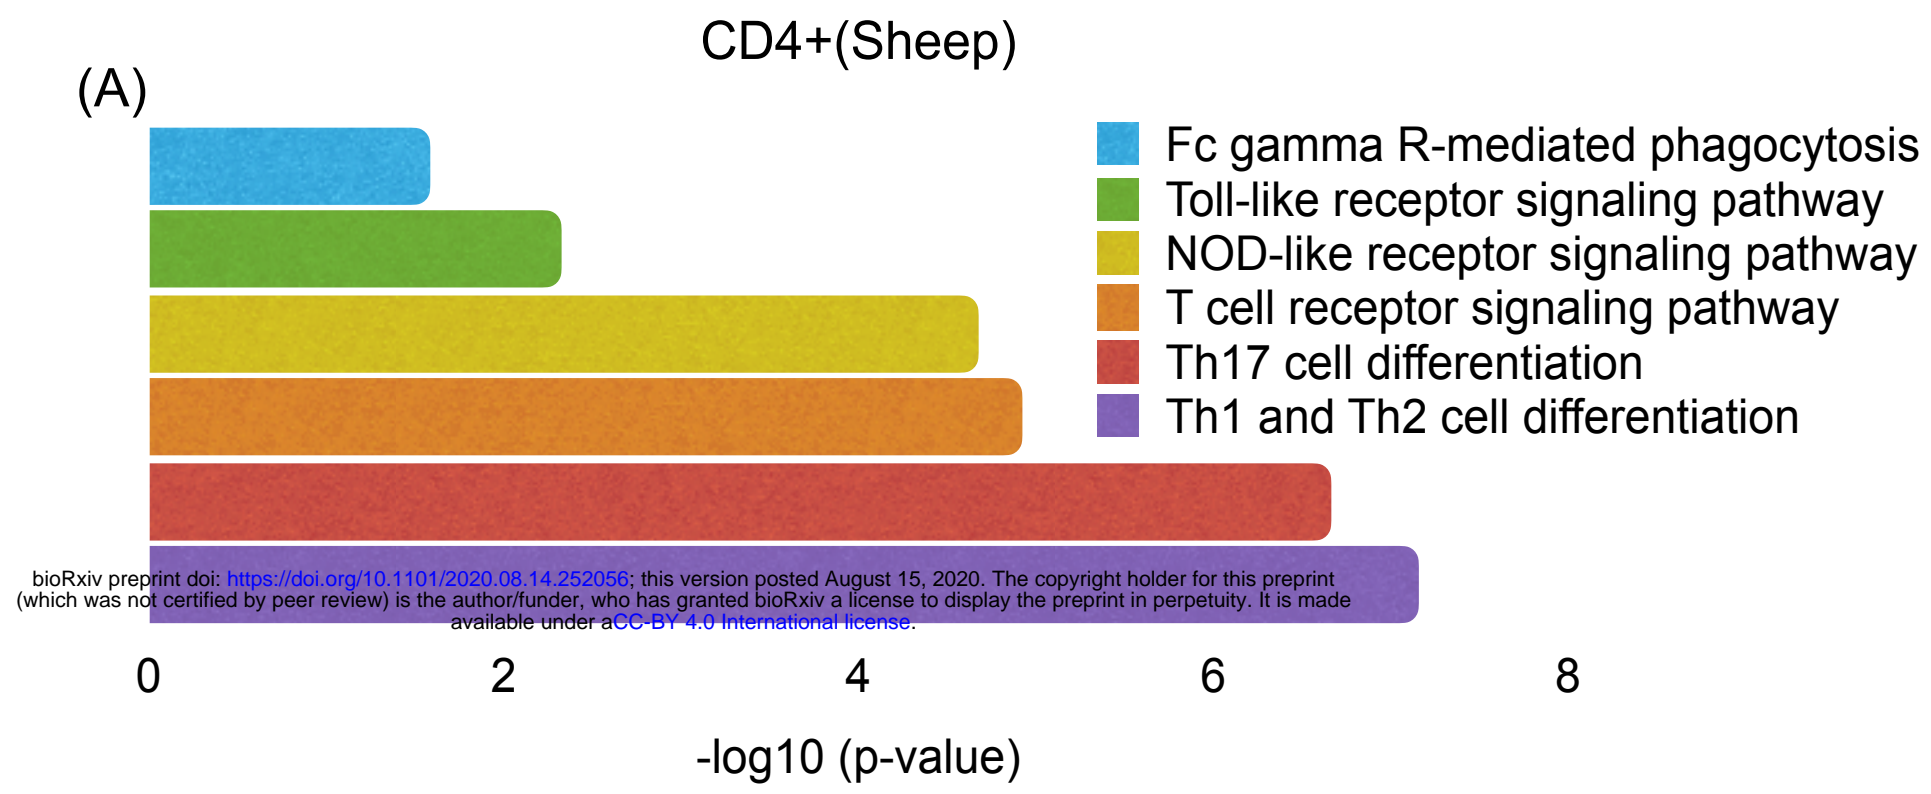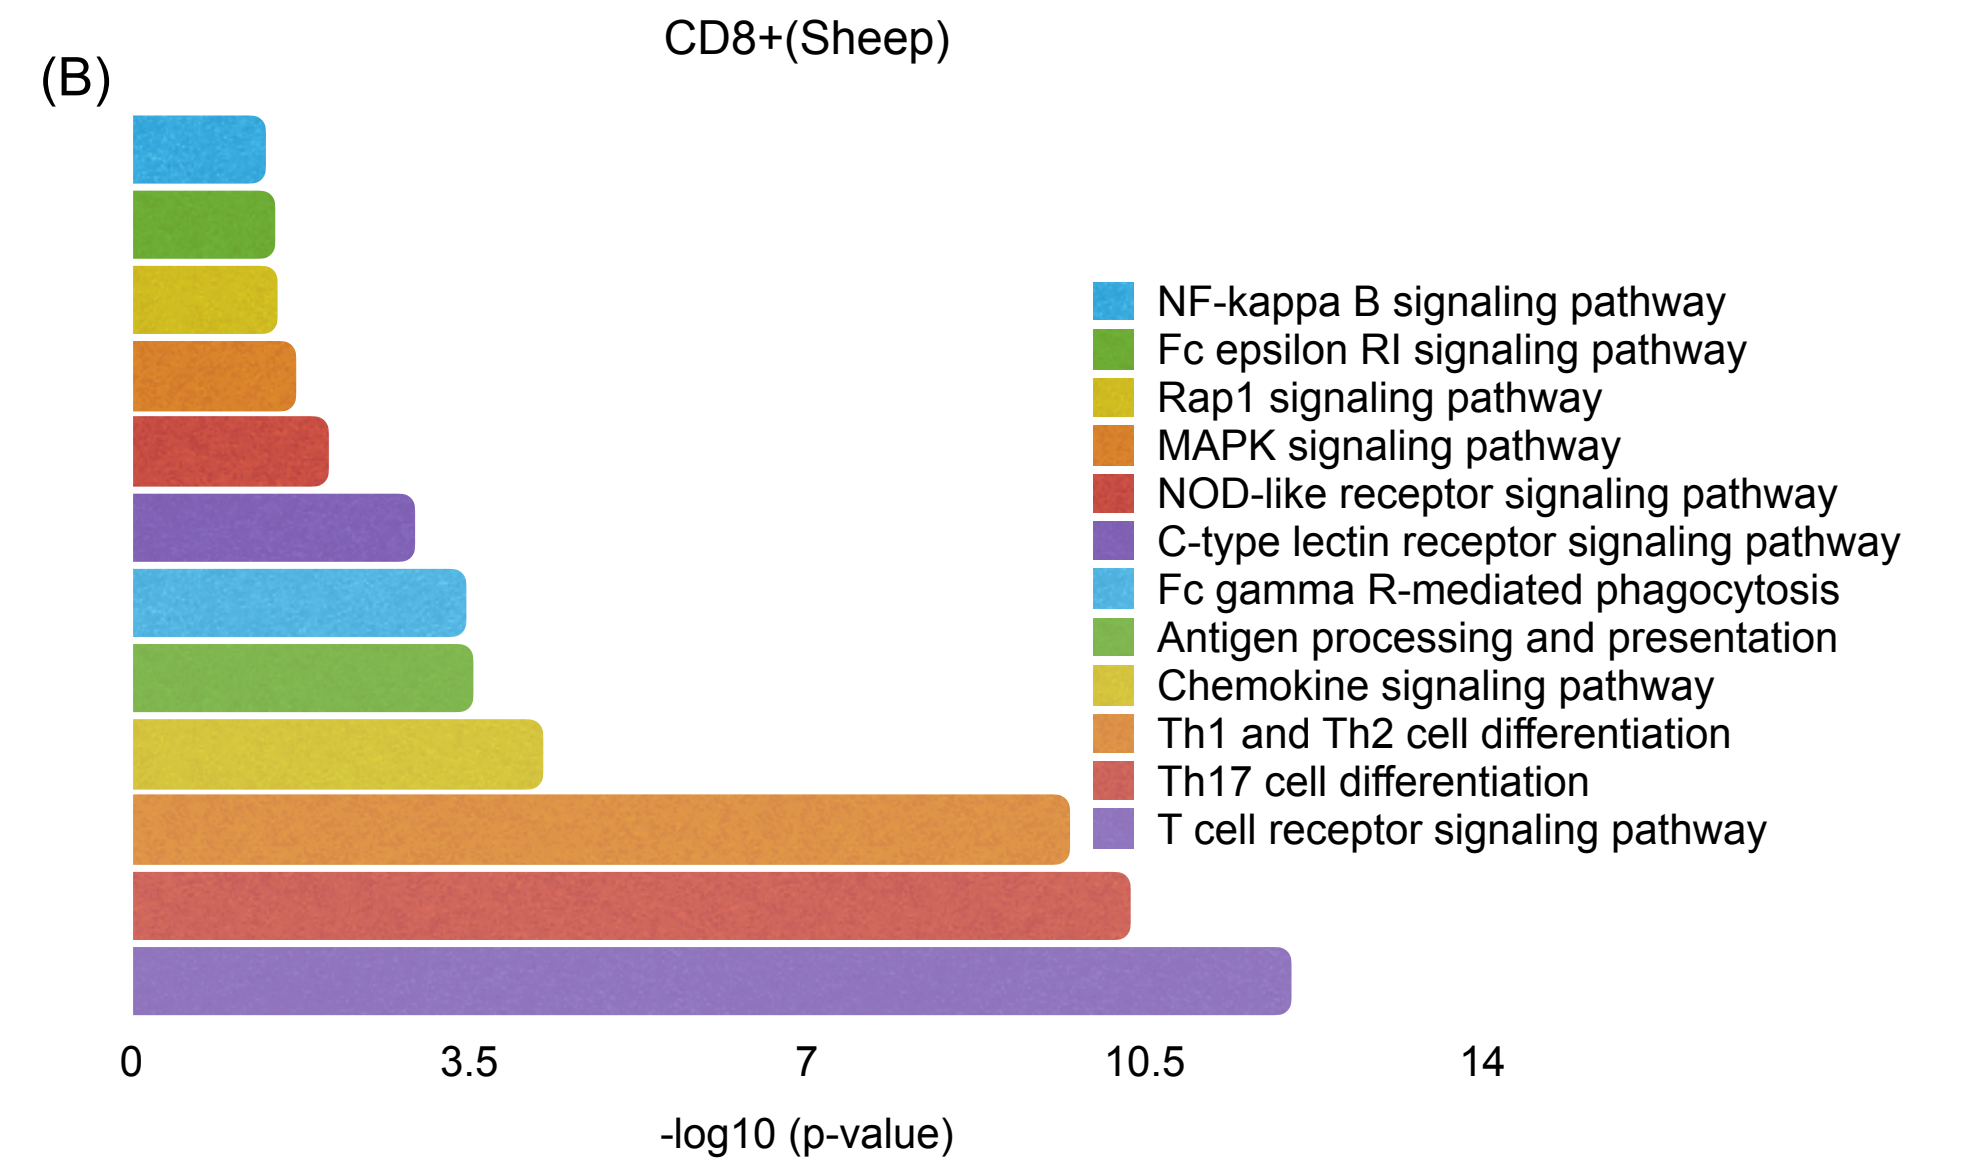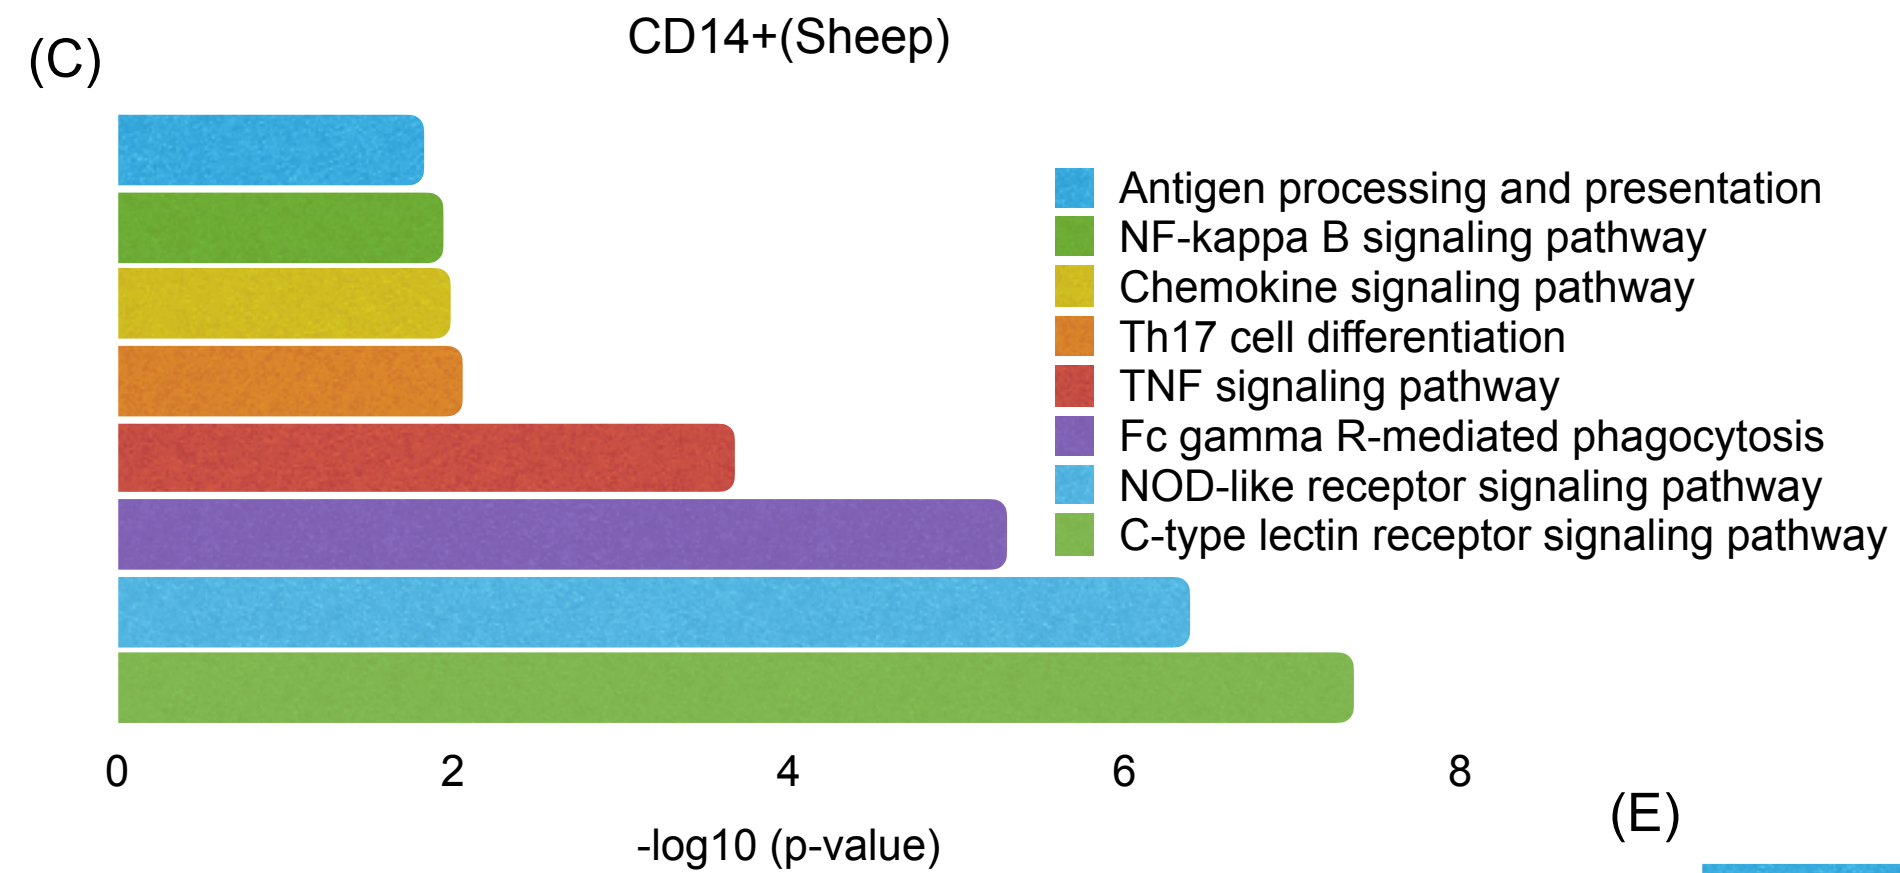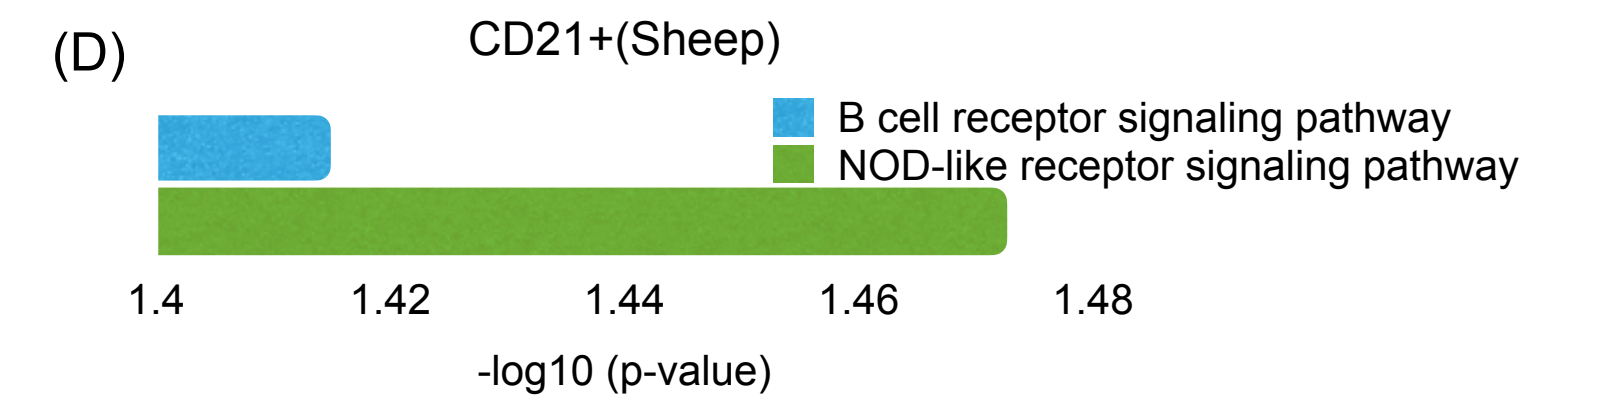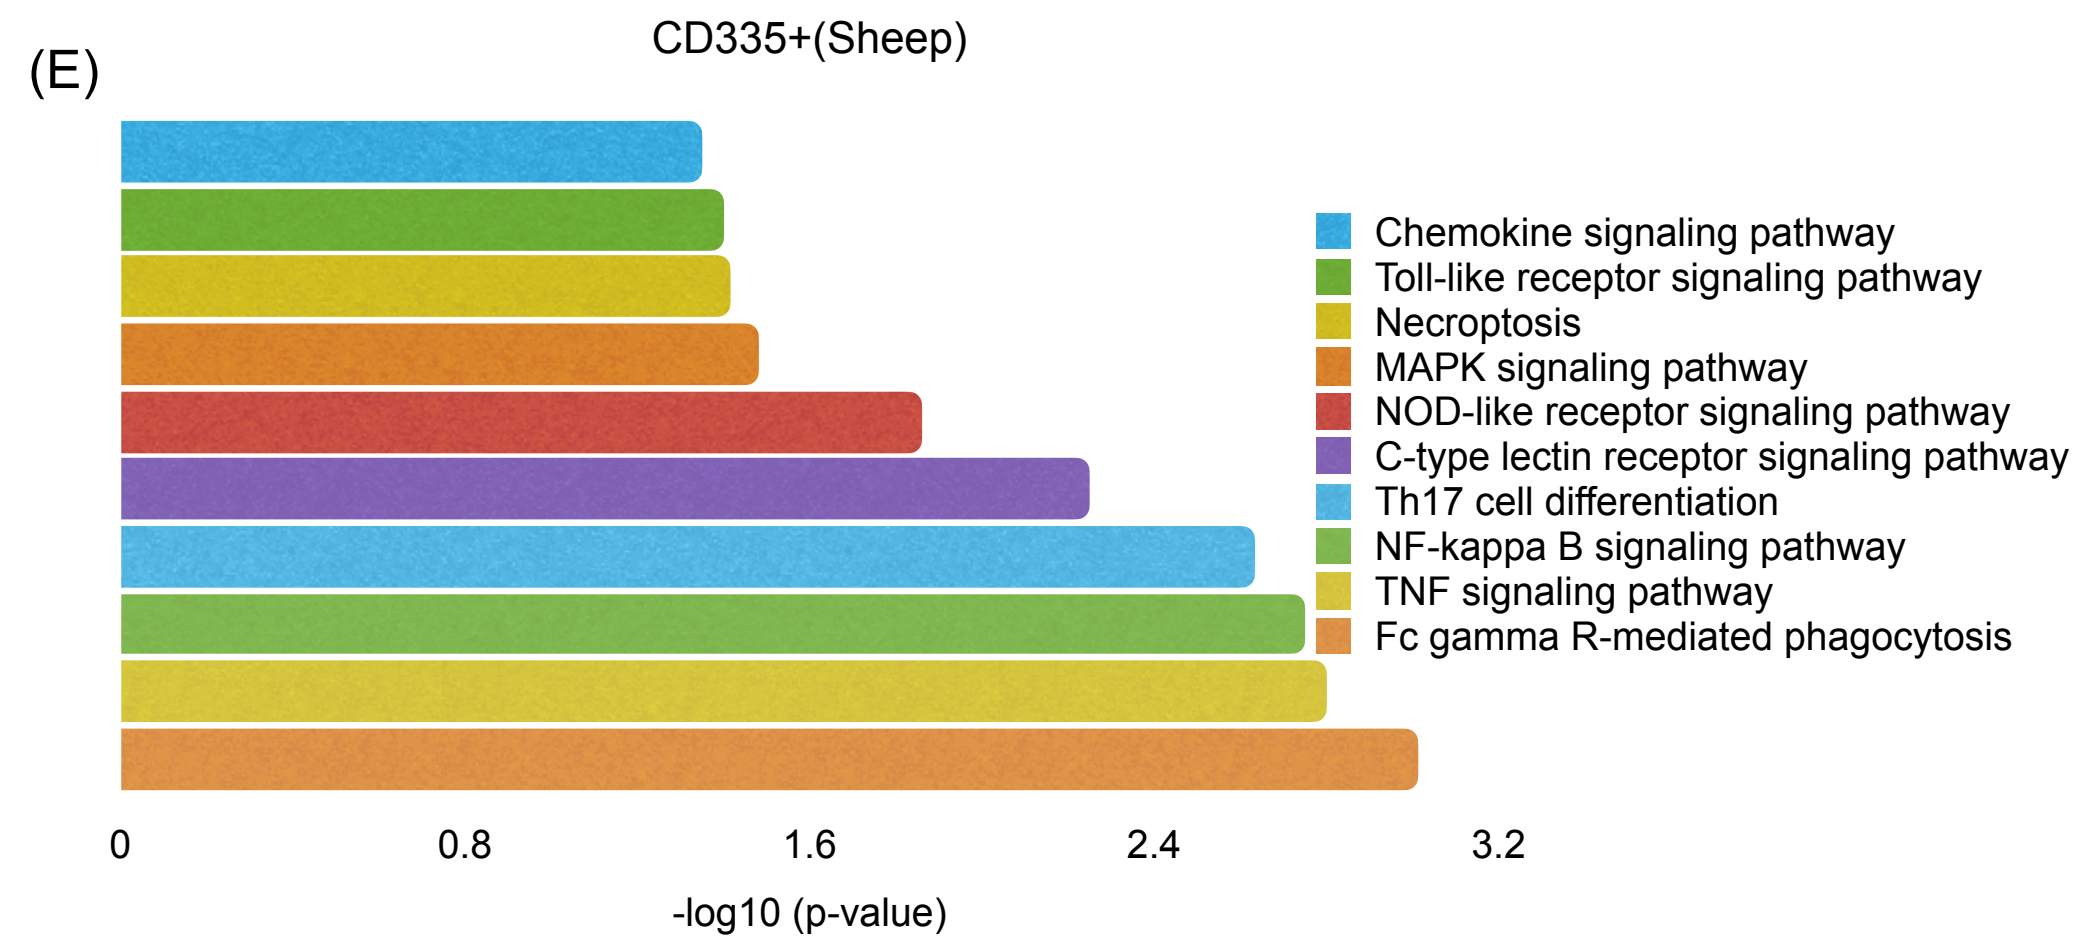



| <b>Canonical Pathways</b>                                                    | <b>CD4+(Goat)</b> | <b>CD4+(Sheep)</b> | <b>CD8+(Goat)</b> | <b>CD8+(Sheep)</b> | <b>CD14+(Goat)</b> | <b>CD14+(Sheep)</b> | <b>CD21+(Goat)</b> | <b>CD21+(Sheep)</b> | <b>CD335+(Goat)</b> | <b>CD335+(Sheep)</b> |
|------------------------------------------------------------------------------|-------------------|--------------------|-------------------|--------------------|--------------------|---------------------|--------------------|---------------------|---------------------|----------------------|
| <i>Activation of IRF by Cytosolic Pattern Recognition Receptors</i>          | 2.524             | 1.213              | 1.941             | 0.775              | 1.414              | 1.147               | 0.378              | -3.162              | 1.347               | -1.347               |
| <i>Acute Phase Response Signaling</i>                                        | 1.826             | 1.091              | 4.426             | 2.683              | 4.323              | 3.43                | -1.571             | -0.302              | 1.387               | -2.661               |
| <i>B Cell Activating Factor Signaling</i>                                    | 0                 | 1.633              | N/A               | 1.633              | -1.265             | 0                   | -2.4               | N/A                 | -2                  | -2.837               |
| <i>B Cell Receptor Signaling</i>                                             | -1.896            | -0.378             | 1.029             | 0.714              | 0.516              | 1.109               | -4.088             | -1.789              | -2.278              | -3.71                |
| <i>CCR5 Signaling in Macrophages</i>                                         | 1                 | 2.121              | 1.414             | 2.111              | 0.333              | 1.414               | -1                 | -2                  | 1.155               | -1.387               |
| <i>CD28 Signaling in T Helper Cells</i>                                      | 0.169             | 2.043              | 1.4               | 3.333              | -0.926             | 0.928               | -2.887             | -2.673              | -0.687              | -4.621               |
| <i>CD40 Signaling</i>                                                        | -0.258            | 1.291              | 0.905             | 0.832              | 0.471              | 0.5                 | -3.157             | -2.646              | -1.671              | -3.182               |
| <i>Chemokine Signaling</i>                                                   | 1.387             | 1.604              | 3.638             | 2.828              | 2.2                | 2.236               | 0                  | -1.633              | 2.746               | -0.2                 |
| <i>CNTF Signaling</i>                                                        | -0.577            | 0.832              | 2.138             | 3.357              | 1.886              | 1.604               | -3.138             | -2.449              | -0.408              | -3.157               |
| <i>Complement System</i>                                                     | 2.236             | N/A                | 2.449             | N/A                | 1.89               | 1.633               | 0.816              | N/A                 | 2.646               | N/A                  |
| <i>Crosstalk between Dendritic Cells and Natural Killer Cells</i>            | 2.84              | 1.414              | 2.673             | 2.828              | 1.698              | 2.333               | 0                  | -1.342              | 2.828               | -1.5                 |
| <i>CXCR4 Signaling</i>                                                       | -0.186            | 1.732              | 3.087             | 1.732              | 2.534              | 2.556               | -1.786             | -2.887              | 0.42                | -2.722               |
| <i>Cytotoxic T Lymphocyte mediated Apoptosis of Target Cells</i>             | 1.414             | 0.447              | 1.89              | 1.89               | -1.342             | 1                   | 1.342              | N/A                 | 1.89                | -2.236               |
| <i>Dendritic Cell Maturation</i>                                             | 1.761             | 2.449              | 3.272             | 1.89               | 2.832              | 2.967               | -1.511             | -2.324              | 1.414               | -3.727               |
| <i>Fc Epsilon RI Signaling</i>                                               | -0.6              | 1.213              | 1.606             | 0.784              | 1.414              | 2.6                 | -2.654             | -2.121              | -0.309              | -2.832               |
| <i>GM-CSF Signaling</i>                                                      | -0.688            | 0.535              | 2.828             | 2.982              | 3.128              | 2.982               | -2.921             | -1.89               | 0.18                | -3.182               |
| <i>Granzyme B Signaling</i>                                                  | -1                | N/A                | N/A               | N/A                | -0.447             | -0.447              | -2.236             | N/A                 | -1.633              | -1.89                |
| <i>HMGB1 Signaling</i>                                                       | 0.209             | 1                  | 3.138             | 3.441              | 2.795              | 3.651               | -1.298             | -2.714              | 0.781               | -2.402               |
| <i>iCOS-iCOSL Signaling in T Helper Cells</i>                                | 0                 | 2                  | 1.291             | 2.268              | -1.095             | 0                   | -2.402             | -2.121              | -0.469              | -4.459               |
| <i>IL-1 Signaling</i>                                                        | 1.265             | 1.897              | 2.236             | 1.667              | 1.604              | 2.309               | -1.633             | -1                  | 0                   | -2.132               |
| <i>IL-15 Signaling</i>                                                       | -0.218            | 1.291              | 2.183             | 3                  | 0.816              | 1.807               | -3.087             | -3                  | -0.686              | -3.43                |
| <i>IL-2 Signaling</i>                                                        | 0.471             | 1.604              | 2.5               | 3.578              | 1.279              | 2.138               | -3.8               | -2.646              | -0.365              | -3.024               |
| <i>IL-22 Signaling</i>                                                       | 0.816             | 2.236              | 2                 | 2.236              | 1.342              | 1.342               | -1.155             | -2                  | 0.302               | -2.111               |
| <i>IL-6 Signaling</i>                                                        | 0.6               | 0.943              | 3.71              | 3.13               | 3.893              | 3.656               | -2.897             | -0.832              | 0.59                | -3.286               |
| <i>IL-7 Signaling Pathway</i>                                                | -0.218            | 1.213              | 0.832             | 1.606              | 0                  | 0.728               | -3.413             | -2.333              | -1.89               | -4.642               |
| <i>IL-8 Signaling</i>                                                        | 0.822             | 2.191              | 4.11              | 3.651              | 4.341              | 4.422               | -2.673             | -3.638              | 0.896               | -3.457               |
| <i>IL-9 Signaling</i>                                                        | 0.577             | 1                  | 0.378             | 1.667              | 0                  | 0.707               | -3                 | -2.646              | -1.698              | -4                   |
| <i>Inflammasome pathway</i>                                                  | 1.414             | -1.342             | 2.449             | N/A                | 2.236              | 1.667               | -0.447             | N/A                 | 2.496               | -1.633               |
| <i>iNOS Signaling</i>                                                        | 2.309             | 2.111              | 3.162             | 2.53               | 2.496              | 2.673               | -0.218             | -1.134              | 2.065               | -2.524               |
| <i>Interferon Signaling</i>                                                  | 2                 | 2.309              | 3.5               | 3.606              | 3                  | 3.742               | 1.342              | -0.707              | 3                   | 0                    |
| <i>MIF Regulation of Innate Immunity</i>                                     | 1.897             | 2.449              | 3                 | 1.342              | 1.667              | 2.309               | 1.732              | -0.447              | 3.357               | -0.277               |
| <i>Natural Killer Cell Signaling</i>                                         | 0.603             | 1.183              | 2.611             | 4.082              | 1.633              | 2.53                | -4.276             | -2.183              | 0.361               | -4.628               |
| <i>NF-κB Activation by Viruses</i>                                           | 0.426             | 2.524              | 2.837             | 2.236              | 2.191              | 2.828               | -3.452             | -2.714              | 0                   | -4.217               |
| <i>NF-κB Signaling</i>                                                       | -0.324            | 0                  | 1.257             | 0.18               | 1.82               | 1.982               | -5.333             | -2.324              | -1.756              | -4.677               |
| <i>p38 MAPK Signaling</i>                                                    | 0.577             | 2.138              | 2.84              | 2.5                | 1.706              | 2.4                 | -1.095             | -0.378              | 0.539               | -3.43                |
| <i>PI3K Signaling in B Lymphocytes</i>                                       | -0.905            | 1.4                | 2.137             | 1.406              | 1.414              | 1.761               | -2.286             | -3.207              | -0.64               | -2.994               |
| <i>PKCθ Signaling in T Lymphocytes</i>                                       | 0.667             | 2.887              | 2.887             | 2.967              | -0.295             | 1.095               | -2.889             | -2.53               | -0.662              | -4.811               |
| <i>Production of Nitric Oxide and Reactive Oxygen Species in Macrophages</i> | 1.622             | 1.177              | 3.43              | 2.556              | 2.771              | 3.086               | -1.886             | -1.964              | 0.254               | -2.853               |
| <i>Role of JAK1, JAK2 and TYK2 in Interferon Signaling</i>                   | N/A               | 0.447              | 2.236             | N/A                | 1.342              | 1.342               | -0.707             | N/A                 | 1.342               | -1.633               |
| <i>Role of NFAT in Regulation of the Immune Response</i>                     | 0.152             | 3.053              | 3.087             | 2.771              | 0.412              | 1.061               | -2.213             | -3.5                | -0.372              | -5.08                |
| <i>Role of Pattern Recognition Receptors in Recognition of Viruses</i>       | 1.4               | 0.5                | 2.449             | 0.535              | 2.785              | 3.266               | -1.915             | -1.633              | 1.298               | -3.272               |
| <i>Role of PI3K/AKT Signaling in the Pathogenesis of Influenza</i>           | -0.775            | 0.378              | 0.707             | 1.667              | 0.832              | -0.302              | -2.183             | -2.828              | -0.655              | -3.153               |
| <i>Role of PKR in Interferon Induction and Antiviral Response</i>            | 2.041             | 0.2                | 2.117             | 0.655              | 1.257              | 1.768               | -2.343             | -1.291              | 0.469               | -2.722               |
| <i>Role of RIG1-like Receptors in Antiviral Innate Immunity</i>              | 1.667             | 0.707              | 1.342             | 0                  | 2.121              | 1.633               | -0.905             | -2                  | 0                   | -2.496               |
| <i>Th1 Pathway</i>                                                           | 0                 | 1.342              | 2.746             | 1.512              | 0.343              | 0.816               | -1.234             | -2.138              | 0.152               | -3.893               |
| <i>Th17 Activation Pathway</i>                                               | 0.277             | -0.277             | -0.707            | 0.728              | -0.943             | 0.535               | -3.4               | -0.378              | -2.353              | -3.771               |
| <i>Th2 Pathway</i>                                                           | 0.557             | 1.043              | 1.46              | 2.117              | 0.354              | 2.065               | -1.947             | -2.121              | 0.762               | -2.874               |
| <i>TNFR1 Signaling</i>                                                       | 1.941             | 1.667              | 1.414             | 2.121              | 2.111              | 2.138               | -2                 | -1                  | 0                   | -2.236               |
| <i>Toll-like Receptor Signaling</i>                                          | 1.265             | 0.577              | 2.111             | -0.632             | 1.807              | 2.324               | -2.236             | 1.342               | 0.688               | -2.065               |
| <i>TREM1 Signaling</i>                                                       | 0.447             | 0                  | 1.5               | 0.426              | 2.711              | 2.837               | -3                 | 0                   | 1.095               | -3.78                |

bioRxiv preprint doi: <https://doi.org/10.1101/2023.06.26.546666>; this version posted July 1, 2023. The copyright holder for this preprint (which was not certified by peer review) is the author/funder, who has granted bioRxiv a license to display the preprint in perpetuity. It is made available under aCC-BY 4.0 International license.

bioRxiv preprint doi: <https://doi.org/10.1101/2020.08.14.252056>; this version posted August 15, 2020. The copyright holder for this preprint (which was not certified by peer review) is the author/funder, who has granted bioRxiv a license to display the preprint in perpetuity. It is made available under aCC-BY 4.0 International license.

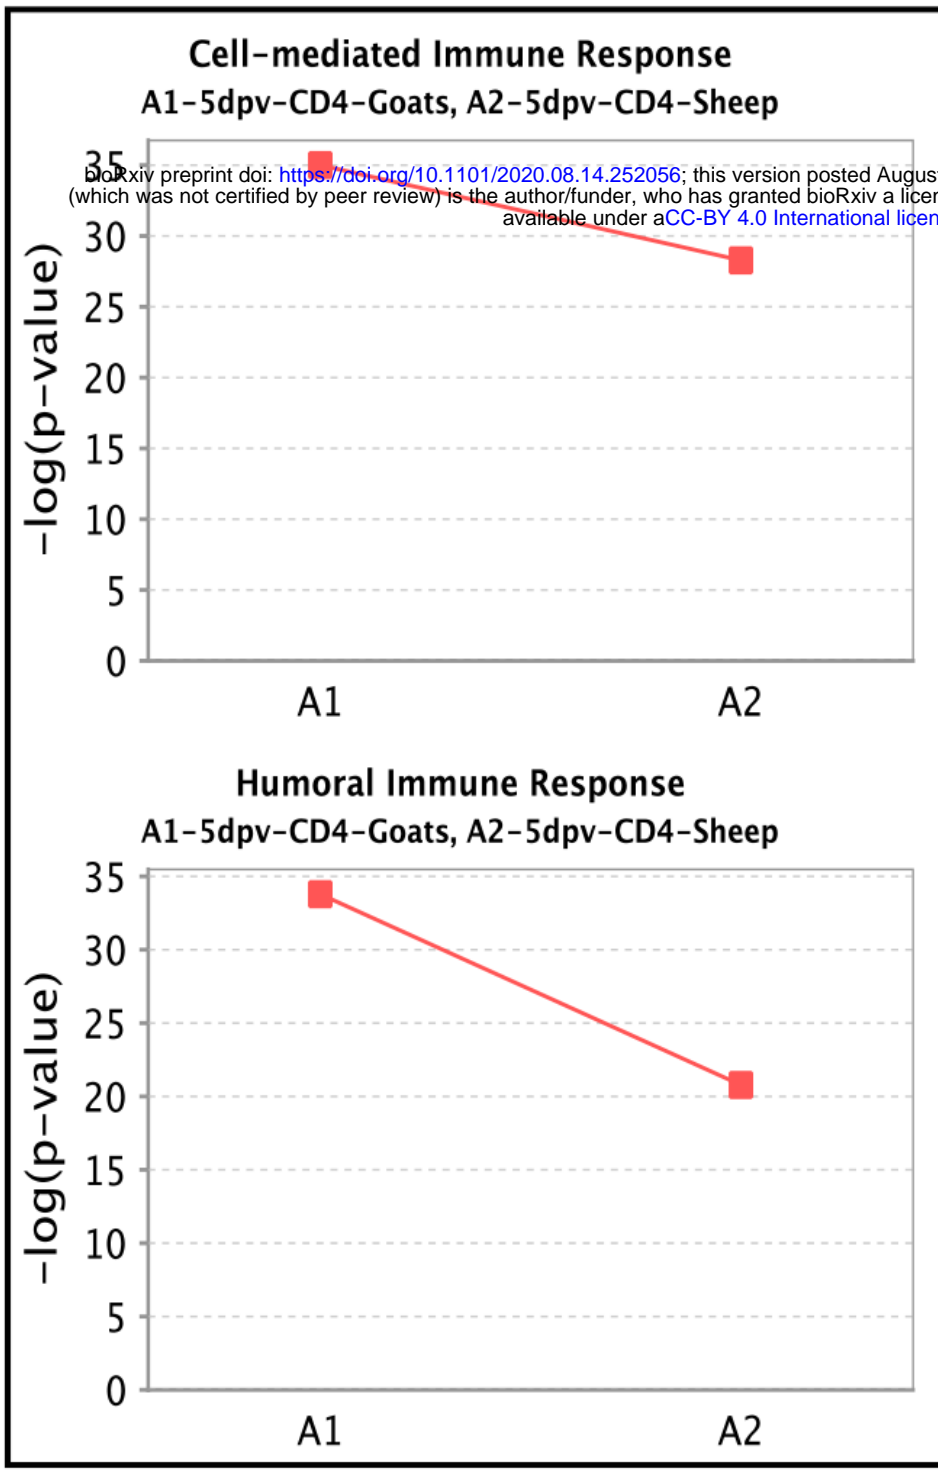

(A)

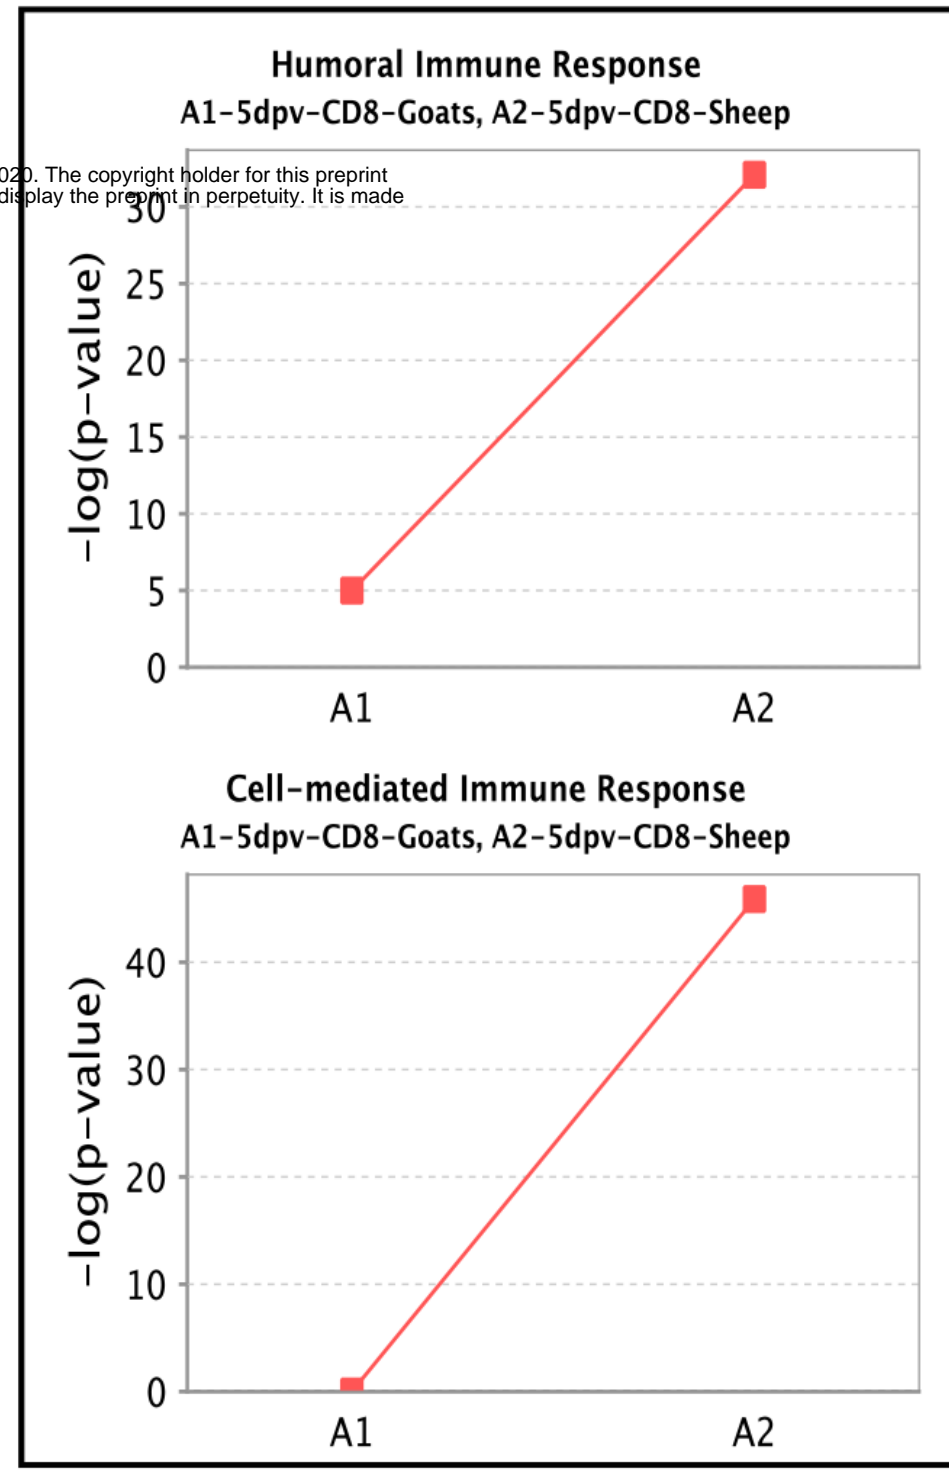

(B)

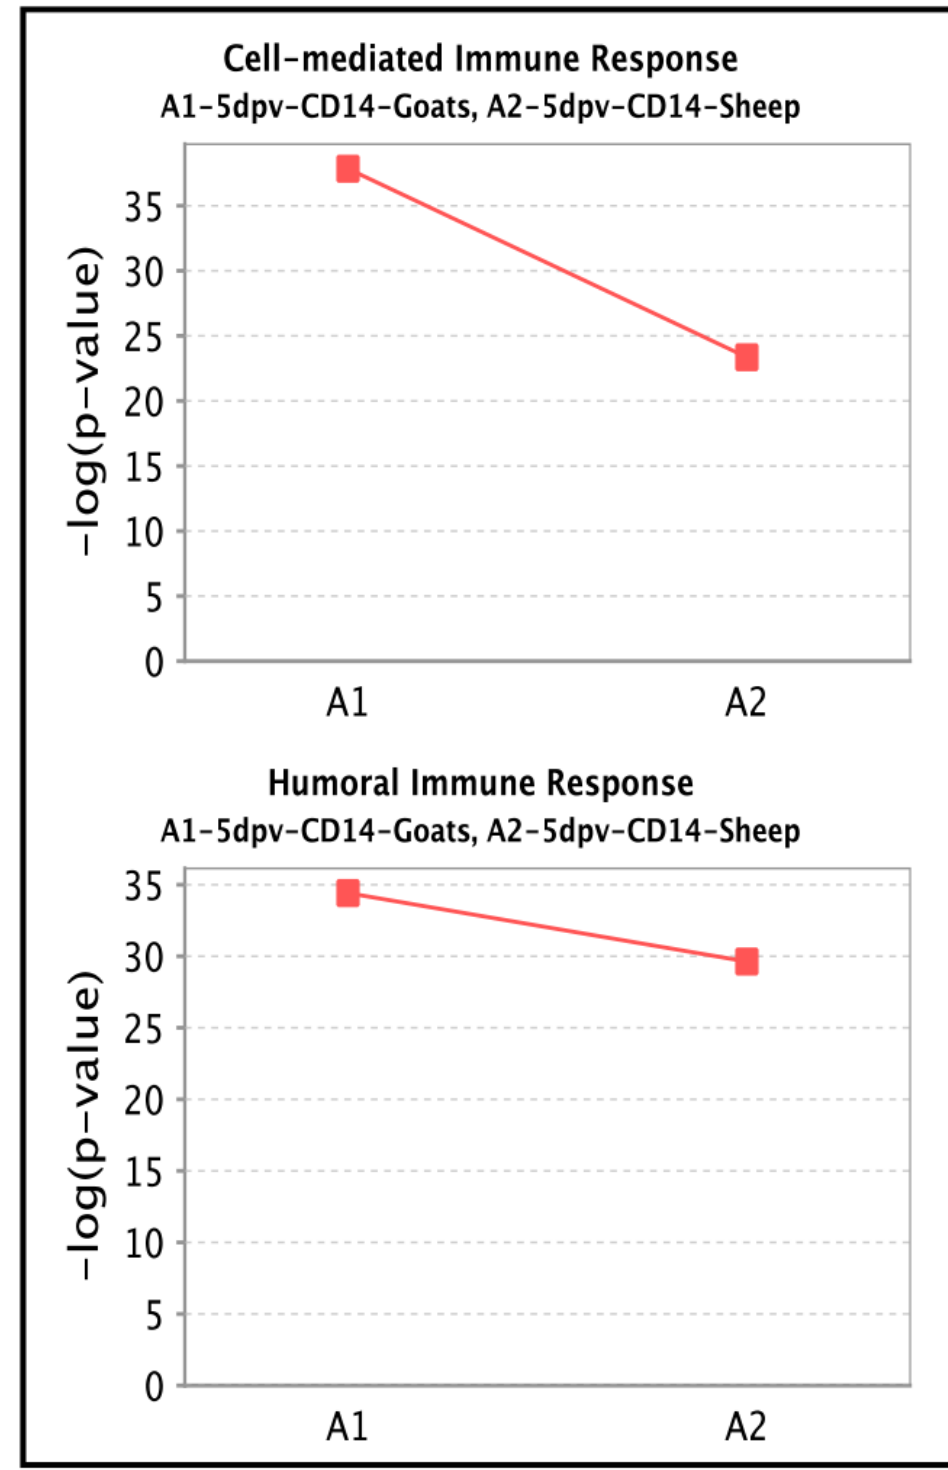

(C)

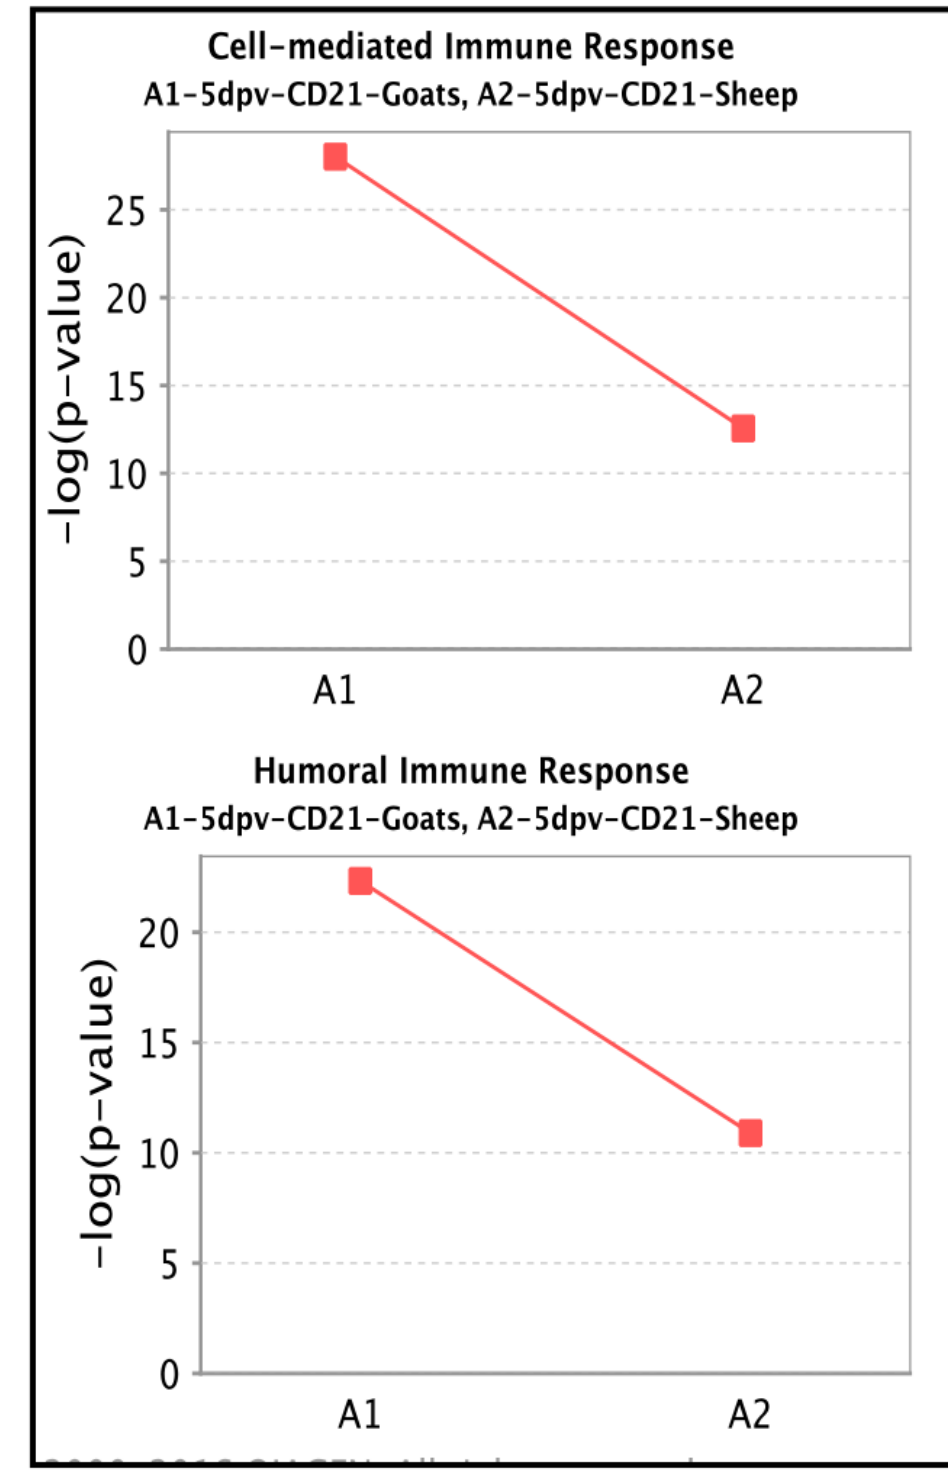

(D)

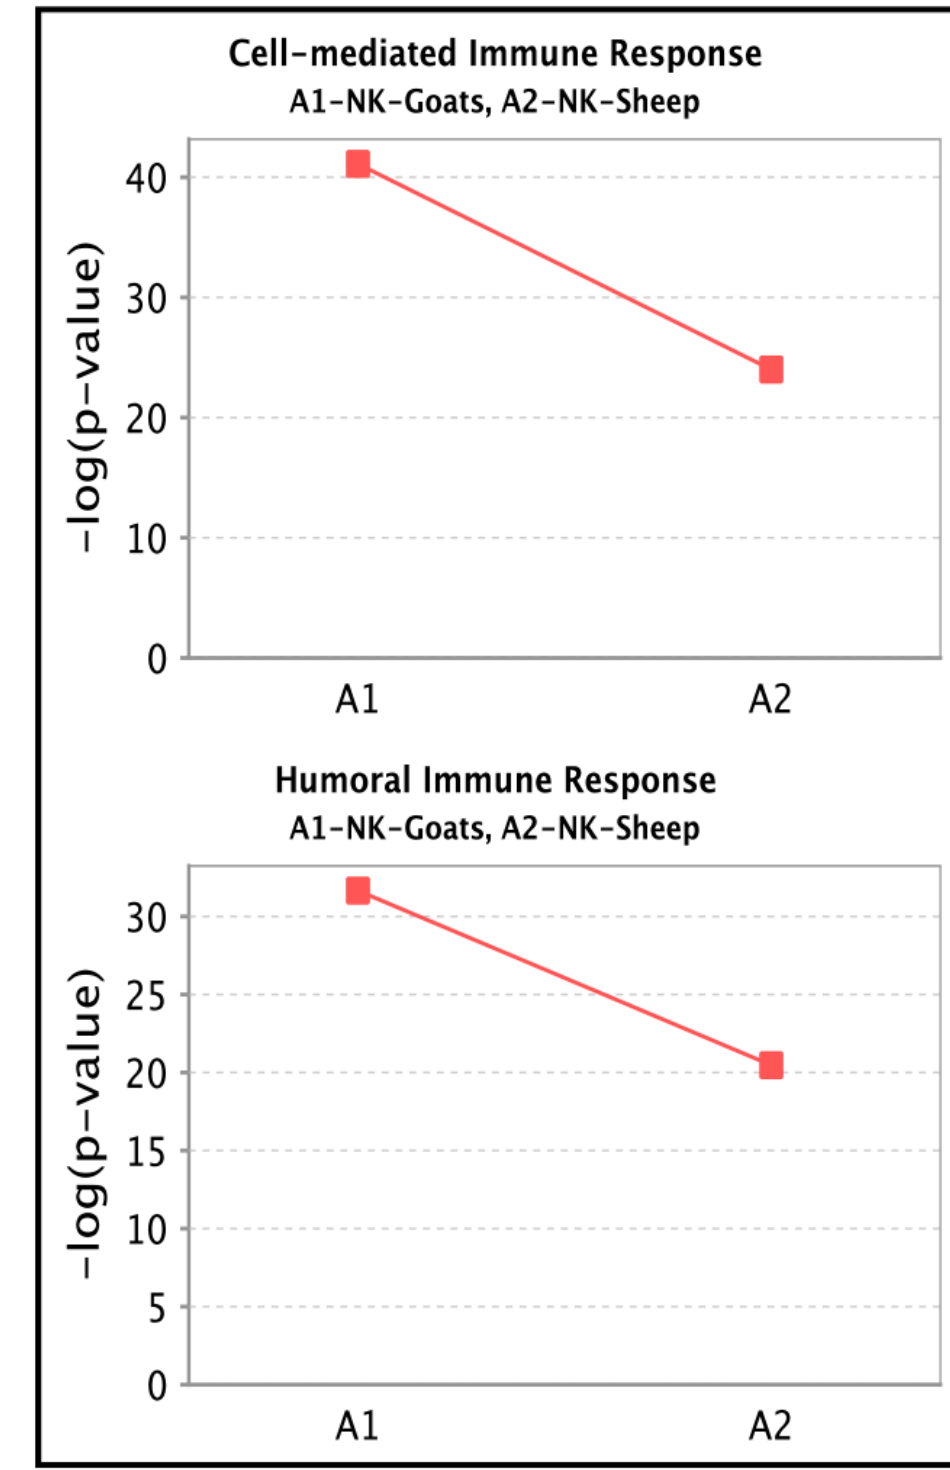

(E)



(A)

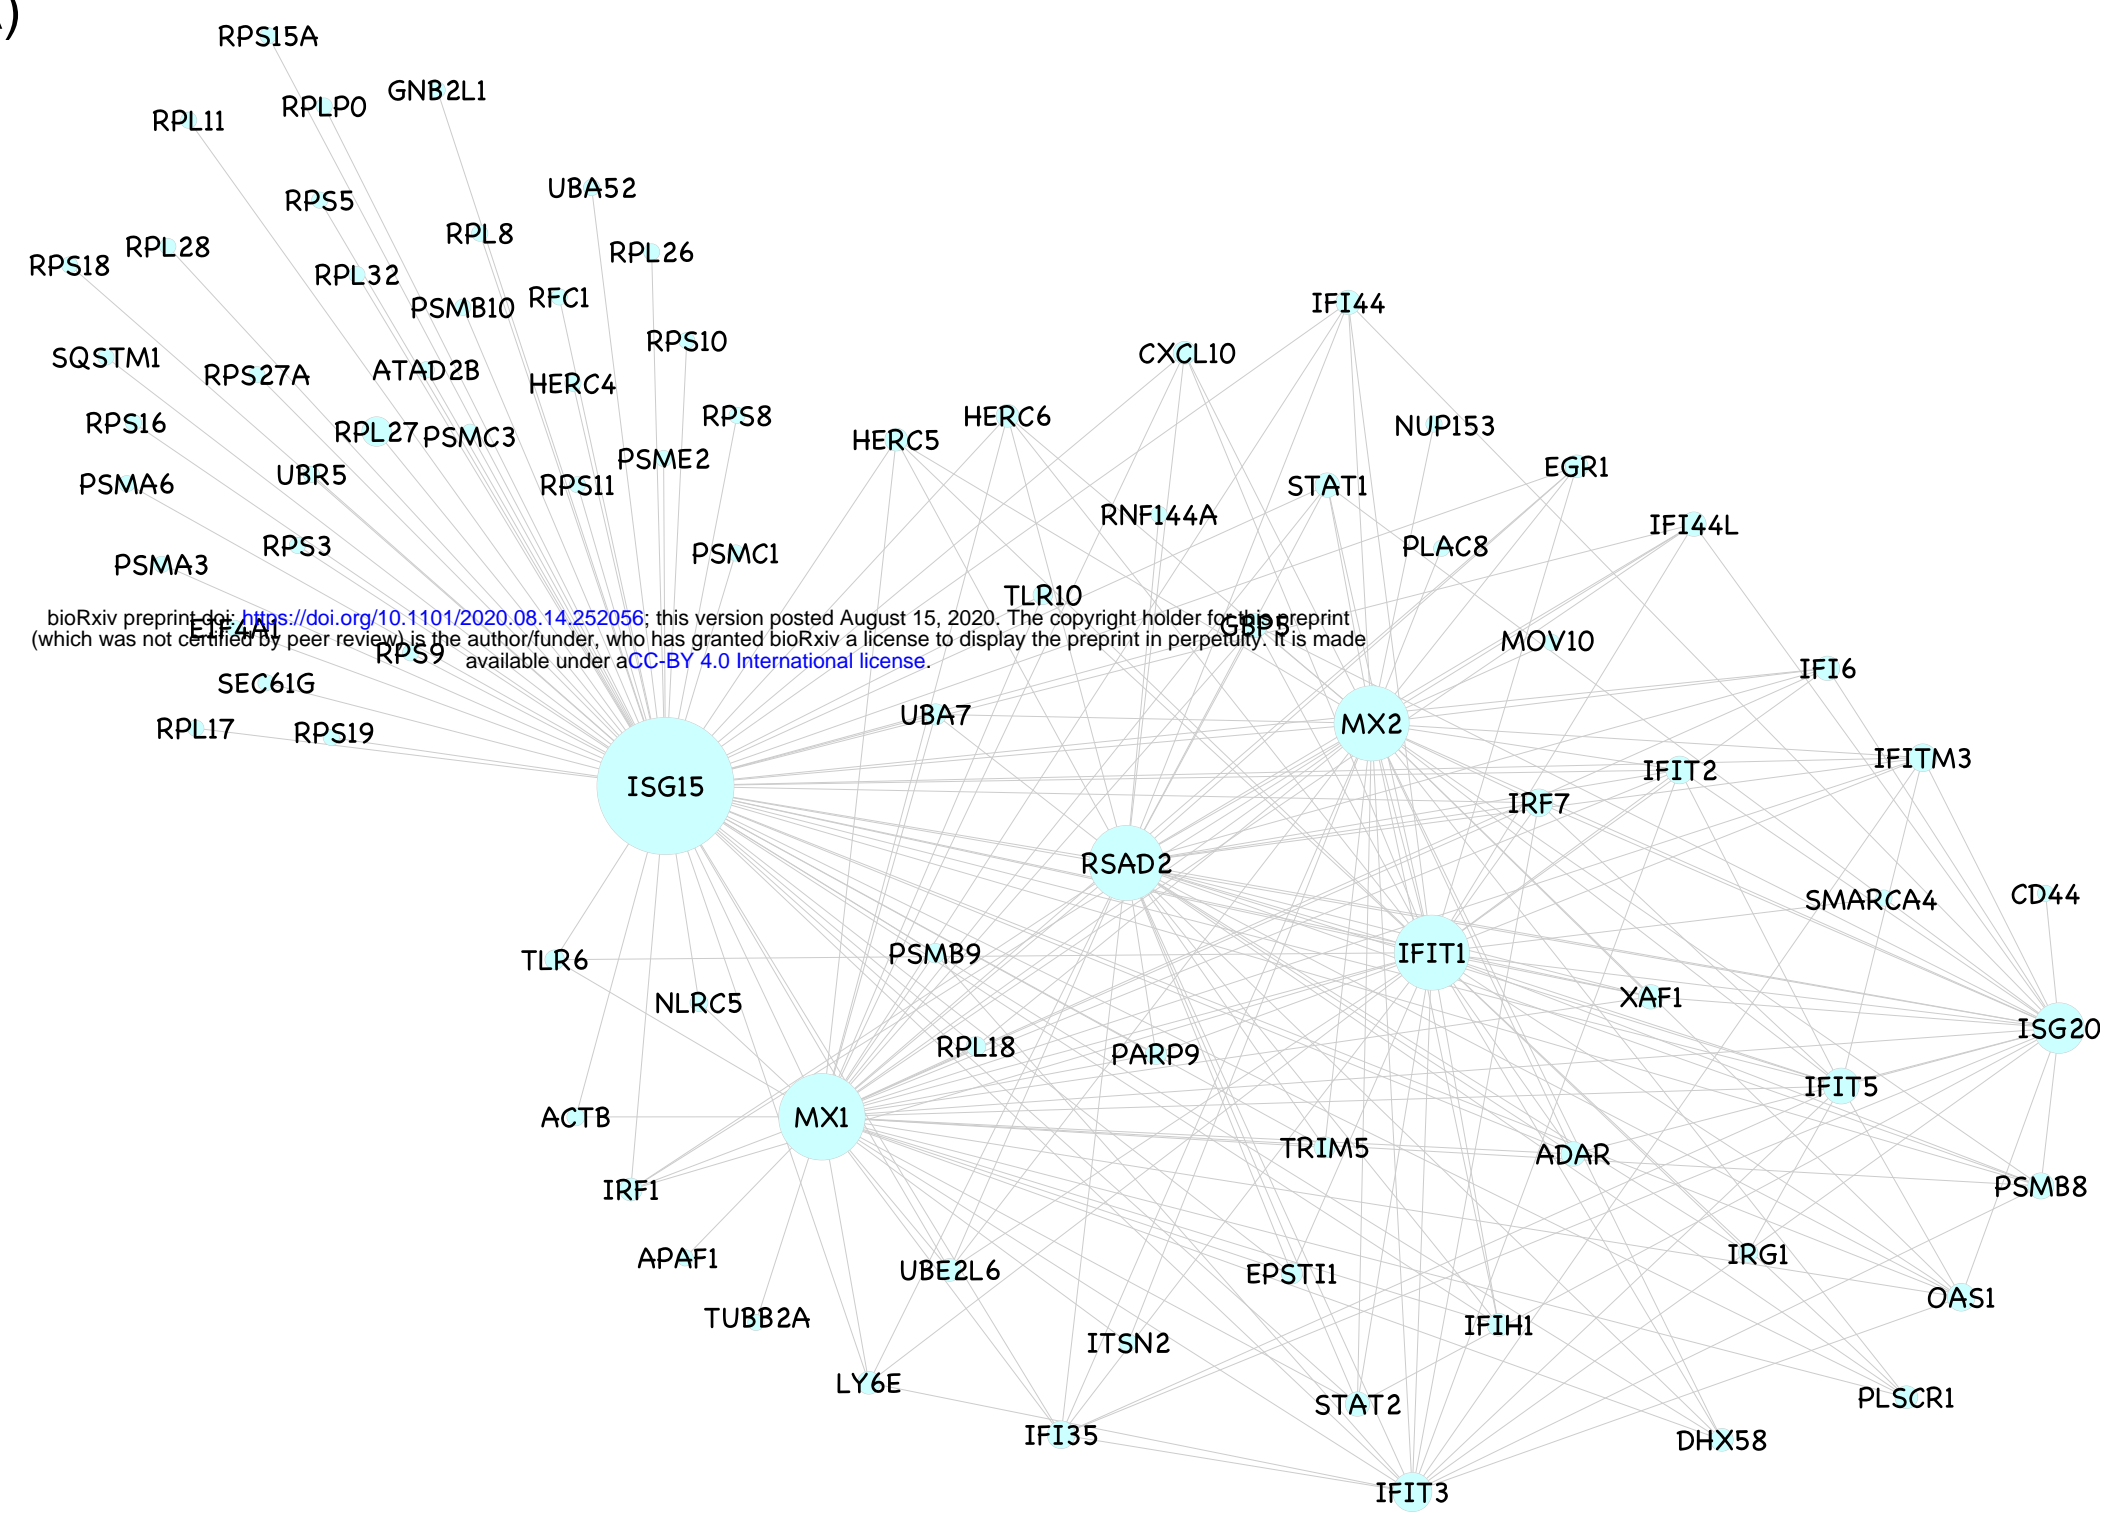

bioRxiv preprint doi: <https://doi.org/10.1101/2020.08.14.252056>; this version posted August 15, 2020. The copyright holder for this preprint (which was not certified by peer review) is the author/funder, who has granted bioRxiv a license to display the preprint in perpetuity. It is made available under aCC-BY 4.0 International license.

(B)

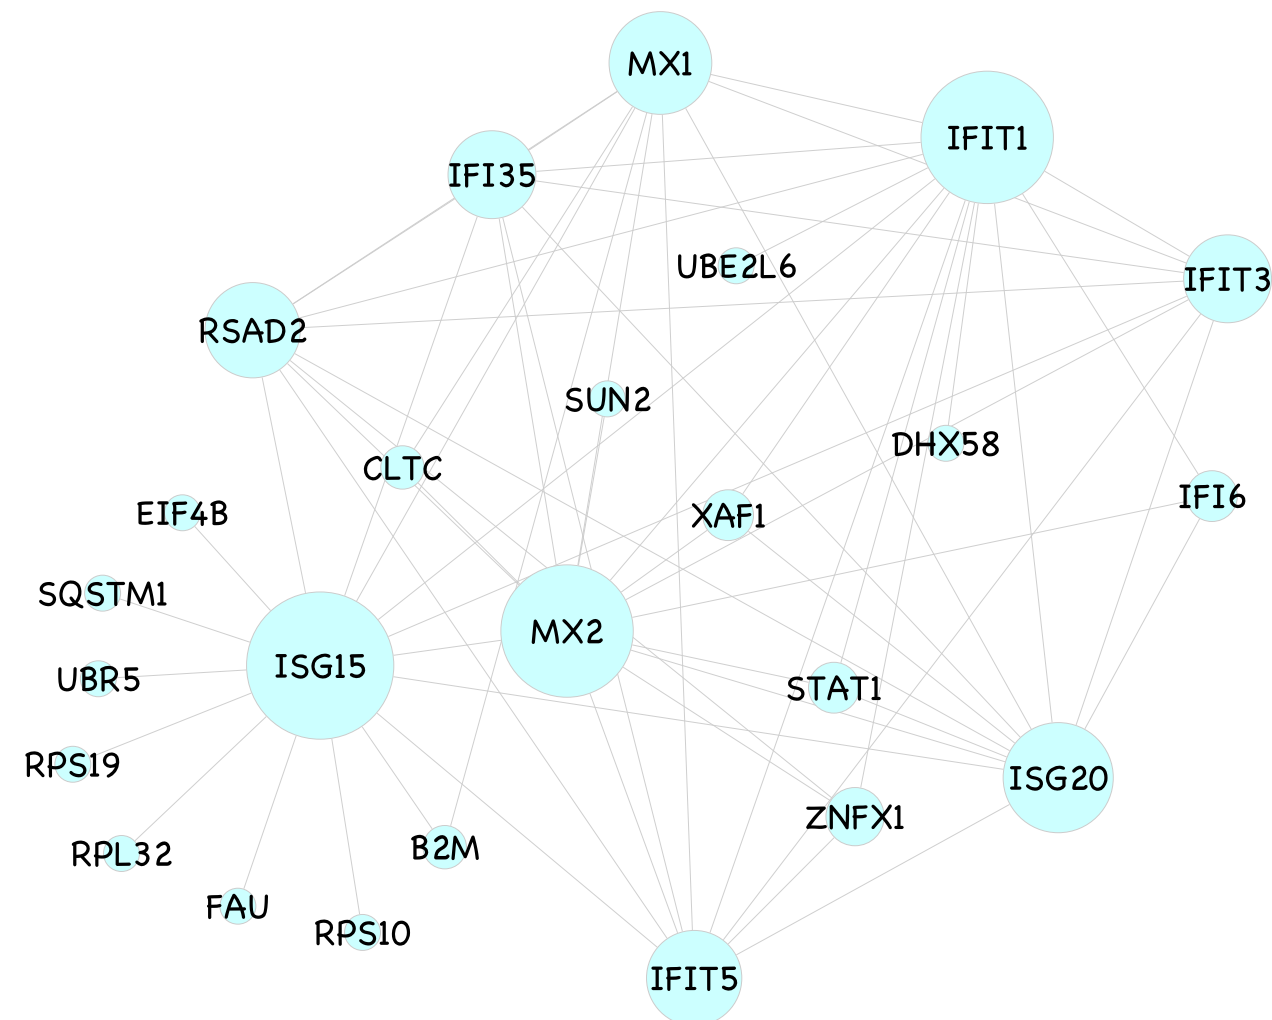

(C)

| Genes          | CD4+(Goat)   | CD8+(Goat)   | CD14+(Goat)  | CD21+(Goat)  | CD335+(Goat) | Genes  | CD4+(Goat)   | CD8+(Goat)   | CD14+(Goat)  | CD21+(Goat)  | CD335+(Goat) |
|----------------|--------------|--------------|--------------|--------------|--------------|--------|--------------|--------------|--------------|--------------|--------------|
| XAF1           | 1.985919432  | 1.71876284   | 1.15136785   | 2.596312933  | 2.793894552  | PSMB10 | 0.733634947  | 0.811814649  | 0.471405892  | 1.797708577  | 1.614186152  |
| UBR5           | -0.846500334 | -0.759261474 | -0.730885501 | -2.133744367 | -1.666365376 | PSMA6  | 0.510611356  | 0.655455073  | 0.693812493  | 1.205230743  | 1.007605142  |
| UBE2L6         | 1.583485414  | 1.768262174  | 1.030203217  | 2.24159954   | 2.218249521  | PSMA3  | 0.557769618  | 0.784140139  | 0.520217636  | 1.66137058   | 0.997966857  |
| UBA7           | 1.474048446  | 0.69800351   | 1.013086907  | 0.640549219  | 1.665751527  | PLSCR1 | 0.873187503  | 1.996412272  | 1.564759696  | 2.403630449  | 3.507333561  |
| UBA52          | 0.603191954  | 0.762936426  | 0.399184392  | 1.731154544  | 1.227057625  | PLAC8  | 1.271393827  | 1.041879029  | 0.788244067  | 1.796782612  | 0.331973468  |
| TUBB2A         | 0.834909533  | 1.376929861  | 3.502396279  | 1.288194232  | 3.002356344  | PARP9  | 0.451327594  | 0.677068178  | 0.298457762  | 0.527184722  | 0.498137374  |
| TRIM5          | 0.867704673  | 0.905132405  | 0.727333005  | 0.39565109   | 1.124896732  | OAS1   | 1.742622357  | 2.312926759  | 1.455953723  | 1.248023064  | 1.921085233  |
| TLR6           | -1.249225733 | -0.627167681 | 0.425388161  | -0.657745261 | -0.422975202 | NUP153 | -0.437629202 | -0.524970959 | -0.488578097 | -2.23713924  | -1.419258684 |
| TLR10          | -2.93621845  | -2.676344862 | -1.850399723 | -1.406230815 | -2.863219945 | NLRC5  | 0.4550748    | 0.253996148  | 0.337083634  | -1.107697252 | -0.213593162 |
| STAT2          | 0.481424937  | 0.709629829  | 0.375608441  | -1.103549185 | 0.588575974  | MX2    | 2.229995482  | 2.455105126  | 1.265294526  | 2.269962652  | 2.669472068  |
| STAT1          | 0.686534554  | 0.979474724  | 0.412903447  | 0.347633714  | 0.761319     | MX1    | 1.436277669  | 1.928714159  | 1.406726256  | 1.872160903  | 1.669321064  |
| SQSTM1         | 0.352276035  | 0.299236491  | 0.298744598  | 0.48397953   | 0.469815216  | MOV10  | 0.565233775  | 0.343280646  | 0.30756072   | 0.587073914  | 0.257462     |
| SMARCA4        | -0.578276522 | -0.510995083 | -0.570504563 | -0.578081186 | -1.04716526  | LY6E   | 1.629232915  | 1.347876258  | -1.449384456 | 1.977711152  | 1.549066722  |
| SEC61G         | 1.198313102  | 1.453634     | 1.021035919  | 2.063245421  | 1.688438395  | ITSN2  | -0.55278938  | -0.352319861 | -0.424744518 | -1.376095373 | -1.319074279 |
| RSAD2          | 1.683033244  | 1.544952511  | 1.323374254  | 1.044086576  | 2.573485598  | ISG20  | 2.690769097  | 2.210485397  | 2.522078248  | 3.469713783  | 4.847516641  |
| RPS9           | 0.777564021  | 0.90868795   | 0.556943188  | 2.068525254  | 1.252645748  | IRF7   | 1.975621957  | 2.041883882  | 1.39959564   | 2.008508899  | 2.423957195  |
| RPS8           | 0.405565069  | 0.428737023  | 0.127851061  | 1.70468363   | 0.781272276  | IRF1   | 0.690274379  | 1.066038277  | 0.641875829  | 0.947798974  | 1.726629791  |
| RPS5           | 0.620685866  | 0.660895494  | 0.157868984  | 1.733896081  | 0.991905629  | IFITM3 | 1.147254384  | 1.492668765  | 1.632635537  | 1.93728427   | 2.719419248  |
| RPS3           | 0.493112145  | 0.658913473  | 0.322262188  | 1.587516454  | 0.934397007  | IFIT5  | 1.576467091  | 1.876552182  | 1.48437405   | 1.294382276  | 2.55568389   |
| RPS27A         | 0.622541955  | 0.632672895  | 0.290766873  | 1.767862173  | 1.056662945  | IFIT3  | 2.088394134  | 2.055511315  | 1.260277191  | 2.566300219  | 3.351404589  |
| RPS19          | 0.774925566  | 0.94882869   | 0.634872728  | 1.972947978  | 1.227759202  | IFIT2  | 2.089832269  | 1.439416054  | 0.84672498   | 1.251977719  | 2.630431043  |
| RPS18          | 0.64305394   | 0.84756223   | 0.596450189  | 1.863417854  | 1.283145592  | IFIT1  | 1.011625524  | 1.604485968  | 1.367435517  |              | 1.941090719  |
| RPS16          | 0.736697087  | 0.682581224  | 0.31126961   | 1.665172295  | 1.096183673  | IFIH1  | 0.51269938   | 0.677131803  | 0.614964862  | 1.089893378  | 1.129685142  |
| RPS15A         | 0.692281103  | 0.79558963   | 0.385424286  | 1.873127663  | 1.186247482  | IFI6   | 2.662452737  | 2.810609128  | 2.056178067  | 4.063842744  | 3.915749987  |
| RPS11          | 0.591095576  | 0.641879172  | 0.121596118  | 1.909370429  | 0.995285135  | IFI44  | 1.611197864  | 1.626112568  | 0.99882251   | 0.957829634  | 1.854207017  |
| RPS10          | 0.683764835  | 0.766661756  | 0.367704038  | 1.668172367  | 1.128759042  | IFI35  | 0.85134324   | 0.832061752  | 1.008101155  | 1.493265385  | 1.379011343  |
| RPLP0          | 0.452694327  | 0.753624734  | 0.240496453  | 1.308888507  | 0.873863646  | HERC6  | 1.251223853  | 1.243896935  | 1.008493382  | 1.654659051  | 2.110535977  |
| RPL8           | 0.658231737  | 0.736402352  | 0.427136492  | 1.712071407  | 1.186120991  | HERC5  | 0.53783446   | 0.680100193  | 0.701848032  | 1.24698382   | 0.617116848  |
| RPL32          | 0.712865273  | 0.66804577   | 0.340914103  | 1.899074019  | 1.255962502  | HERC4  | -0.841200614 | -0.968971928 | -0.650860266 | -0.82631207  | -0.744158812 |
| RPL28          | 0.846636567  | 0.911404503  | 0.639643406  | 1.882778237  | 1.39979175   | GP5    | 1.032090025  | 0.697919258  | 0.687773578  | 1.953152755  | 1.675931943  |
| RPL26          | 0.392999094  | 0.58011021   | 0.197461445  | 1.769147365  | 1.04455426   | EBST1  | 1.020866224  | 1.373996773  | 1.261346301  | 1.795698135  | 1.302099731  |
| RPL18          | 0.701113137  | 0.725097955  | 0.503321859  | 1.698767509  | 1.227847141  | EIF4A1 | 0.293040687  | 0.729964388  | 0.659183743  | 1.214401196  | 0.904770093  |
| RPL17-C18orf32 | 0.640708457  | 0.538833383  | 0.215656928  | 1.956335182  | 1.10988575   | EGR1   | 1.760755155  | -1.443962337 | 0.304496671  | -4.962753888 | 3.197575567  |
| RPL11          | 0.461682141  | 0.586630315  | 0.381422392  | 1.54011522   | 0.833372263  | DHX58  | 1.336670449  | 1.255929883  | 1.320958745  | 1.10218703   | 1.481351351  |
| RNF144A        | -1.762118555 | -1.662711873 | -2.220342188 | -1.212212469 | -1.836131361 | CXCL10 | 1.792154502  | 3.422134781  | 2.31101281   | 3.539210836  | 2.888757896  |
| RFC1           | -0.736550972 | -0.789847617 | -0.873204868 | -1.5013996   | -1.460412784 | CD44   | 0.381670686  | 0.683512435  | 0.440690852  | 1.352904732  | 2.164353953  |
| PSME2          | 0.673680396  | 1.148968677  | 0.781523858  | 1.91730791   | 1.77574944   | ATAD2B | -0.768274143 | -1.011170596 | -0.724555682 | -2.526543754 | -1.654225422 |
| PSMC3          | 0.514993979  | 0.541902318  | 0.565066178  | 1.294655603  | 0.625377969  | APAF1  | -0.628435852 | -0.7267511   | -0.523891148 | -3.304771213 | -1.375874722 |
| PSMC1          | 0.510614155  | 0.416092405  | 0.646466185  | 1.039847072  | 0.952878937  | ADAR   | 0.504687791  | 0.43592216   | 0.561508709  | -2.033047968 | -0.277606608 |
| PSMB9          | 0.649206706  | 0.864351477  | 0.783614851  | 1.512848475  | 1.229128582  | ACTB   | -0.409201064 | 0.233056082  | 0.163420159  | 0.533279959  | 0.402504285  |
| PSMB8          | 0.468121416  | 0.7005429    | 0.472003684  | 0.923825114  | 0.863216931  |        |              |              |              |              |              |

(D)

| Genes  | CD4+(Sheep)  | CD8+(Sheep)  | CD14+(Sheep) | CD21+(Sheep) | CD335+(Sheep) |
|--------|--------------|--------------|--------------|--------------|---------------|
| B2M    | 0.555014805  | 0.743559759  | 0.642736118  | -3.166964292 | 0.176715854   |
| CLTC   | -0.611987861 | -0.247385808 | -0.162945173 | -3.778268513 | -1.807783063  |
| DHX58  | 0.931844411  | 0.940998189  | 1.283793745  | 1.950240107  | 1.570444101   |
| EIF4B  | 0.201399468  | 0.326584257  | 0.285660754  | -2.392207708 | -0.350743731  |
| FAU    | 1.038610455  | 0.789887926  | 0.847207417  | 0.948749522  | 3.745174852   |
| IFI35  | 0.662547359  | 0.897738796  | 1.097915998  | 1.741171778  | 2.700369988   |
| IFI6   | 2.701745023  | 3.635058039  | 3.719327423  | 4.320482769  | 4.755508796   |
| IFIT3  | 0.951666611  | 1.648452647  | 2.122316917  |              |               |
| ISG15  | 2.616943843  | 3.318903048  | 4.298601385  | 5.329151576  | 8.084652166   |
| MX1    | 1.070460774  | 0.953951731  | 2.117664923  |              |               |
| MX2    | 1.263597474  | 0.954600131  | 1.503219659  |              |               |
| RPL32  | 0.829700069  | 0.684574133  | 0.682085333  | 1.036138102  | 3.491284495   |
| RPS10  | 0.791819633  | 0.542729659  | 0.561397257  | 0.97346268   | 3.107929968   |
| RPS19  | 0.969410857  | 0.624354671  | 0.715343866  | 1.369822956  | 3.712340186   |
| RSAD2  | 1.000793076  | 1.63556357   | 3.011670856  |              |               |
| SQSTM1 | 0.393547984  | 0.572013184  | 0.435207049  | -3.779889764 | -1.998615399  |
| STAT1  | 0.46995802   | 0.700672665  | 0.401877473  | -4.255216254 | -0.780305439  |
| SUN2   | 0.369178067  | 0.82537195   | -0.326065822 | -6.160606981 | -2.114598903  |
| UBE2L6 | 1.343925734  | 1.17152532   | 0.823433926  | 2.322966095  | 2.144767883   |
| UBR5   | -0.502610312 | -0.536023915 | -0.661688091 | -2.962216415 | -3.174126569  |
| XAF1   | 1.574601815  | 1.268233816  | 1.586611438  | 2.18494683   | 2.609327539   |
| ZNF1   | 1.159804825  | 1.392658968  | 1.364107897  | -1.80735843  | 1.043963877   |
| ISG20  |              | 2.792463239  | 3.201044467  |              | 3.123564522   |
| IFIT5  |              | 1.082622922  | 2.112629892  |              |               |
| IFIT1  |              | 1.284923043  | 2.744670094  |              |               |



Table 1.A: log<sub>2</sub>FC from RNAseq and qRT-PCR of PBMC subsets isolated from sungri/96 vaccinated Goat

| Gene  | CD4                              |                                 | CD8                              |                                 | CD14                             |                                 | CD21                             |                                 | CD335                            |                                 |
|-------|----------------------------------|---------------------------------|----------------------------------|---------------------------------|----------------------------------|---------------------------------|----------------------------------|---------------------------------|----------------------------------|---------------------------------|
|       | log <sub>2</sub> FC from qRT-PCR | log <sub>2</sub> FC from RNAseq | log <sub>2</sub> FC from qRT-PCR | log <sub>2</sub> FC from RNAseq | log <sub>2</sub> FC from qRT-PCR | log <sub>2</sub> FC from RNAseq | log <sub>2</sub> FC from qRT-PCR | log <sub>2</sub> FC from RNAseq | log <sub>2</sub> FC from qRT-PCR | log <sub>2</sub> FC from RNAseq |
| DDX58 | 1.179333333                      | 1.163823481                     | 1.123333333                      | 1.126889098                     | 0.980666667                      | 0.897711159                     |                                  |                                 | 0.97                             | 0.866777509                     |
| IFIT3 | 2.308666667                      | 2.088394134                     | 2.12                             | 2.055511315                     | 0.869802704                      | 1.260277191                     | 2.630251215                      | 2.566300219                     | 3.071333333                      | 3.351404589                     |
| IRF7  | 2.005631332                      | 1.975621957                     | 1.945542755                      | 2.041883882                     | 1.051373011                      | 1.39959564                      | 1.936792165                      | 2.008508899                     | 2.627666667                      | 2.423957195                     |
| ISG15 | 3.193989334                      | 3.483488156                     | 3.214456762                      | 3.642171919                     | 1.508623454                      | 2.749599382                     | 5.020430272                      | 4.958535352                     | 4.033333333                      | 4.817152957                     |
| MX1   | 1.164756699                      | 1.436277669                     | 1.825847584                      | 1.928714159                     | 1.289272029                      | 1.406726256                     | 2.063278147                      | 1.872160903                     | 1.556666667                      | 1.669321064                     |

Table 1.B: log<sub>2</sub>FC from RNAseq and qRT-PCR of PBMC subsets isolated from sungri/96 vaccinated Sheep

| Gene  | CD4                              |                                 | CD8                              |                                 | CD14                             |                                 | CD21                             |                                 | CD335                            |                                 |
|-------|----------------------------------|---------------------------------|----------------------------------|---------------------------------|----------------------------------|---------------------------------|----------------------------------|---------------------------------|----------------------------------|---------------------------------|
|       | log <sub>2</sub> FC from qRT-PCR | log <sub>2</sub> FC from RNAseq | log <sub>2</sub> FC from qRT-PCR | log <sub>2</sub> FC from RNAseq | log <sub>2</sub> FC from qRT-PCR | log <sub>2</sub> FC from RNAseq | log <sub>2</sub> FC from qRT-PCR | log <sub>2</sub> FC from RNAseq | log <sub>2</sub> FC from qRT-PCR | log <sub>2</sub> FC from RNAseq |
| DDX58 | 1.311                            | 1.443982294                     | 2.006666667                      | 1.880321932                     | 1.806666667                      | 1.630166862                     |                                  |                                 |                                  |                                 |
| IFIT3 | 0.536779277                      | 0.951666611                     | 1.696666667                      | 1.648452647                     | 1.923333333                      | 2.122316917                     |                                  |                                 |                                  |                                 |
| IRF7  | 2.214341863                      | 2.174678699                     | 1.843333333                      | 2.320513832                     | 3.233333333                      | 3.017430161                     |                                  |                                 | 3.153333333                      | 3.669000639                     |
| ISG15 | 2.781512248                      | 2.616943843                     | 2.796666667                      | 3.318903048                     | 3.126666667                      | 4.298601385                     | 4.142500178                      | 5.329151576                     | 5.643333333                      | 8.084652166                     |
| MX1   | 1.34357254                       | 1.070460774                     | 1.01                             | 0.953951731                     | 2.186666667                      | 2.117664923                     |                                  |                                 |                                  |                                 |
